# Supplementary material for: Comparison of the scavenging capacities of phloroglucinol and 2,4,6-trihydroxypyridine towards HO˙ radical: a computational study
Source: Royal Society of Chemistry journal article supplement (doi:10.1039/d0ra08377a), 2020-01-01
Supplement: d0ra08377a1.pdf [file d0ra08377a1.pdf]

**RSC Advances**

**Supplementary information**

associated with the paper

**Comparison of the scavenging capacities of phloroglucinol and 2,4,6-trihydroxypyridine  
towards HO• radical: a computational study**

*Žiko Milanović<sup>a</sup>, Jelena Tošović<sup>a,\*</sup>, Svetlana Marković<sup>a</sup>, Zoran Marković<sup>b</sup>*

<sup>a</sup> University of Kragujevac, Faculty of Science, Department of Chemistry, 12 Radoja  
Domanovića, 34000 Kragujevac, Serbia

<sup>b</sup> University of Kragujevac, Institute for Information Technologies, Department of Science,  
Jovana Cvijića bb, 34000 Kragujevac, Serbia

\*Corresponding author:

Phone/Fax: +381-34-336-223 /+381-34-335-039

E-mail: jelena.tosovic@pmf.kg.ac.rs

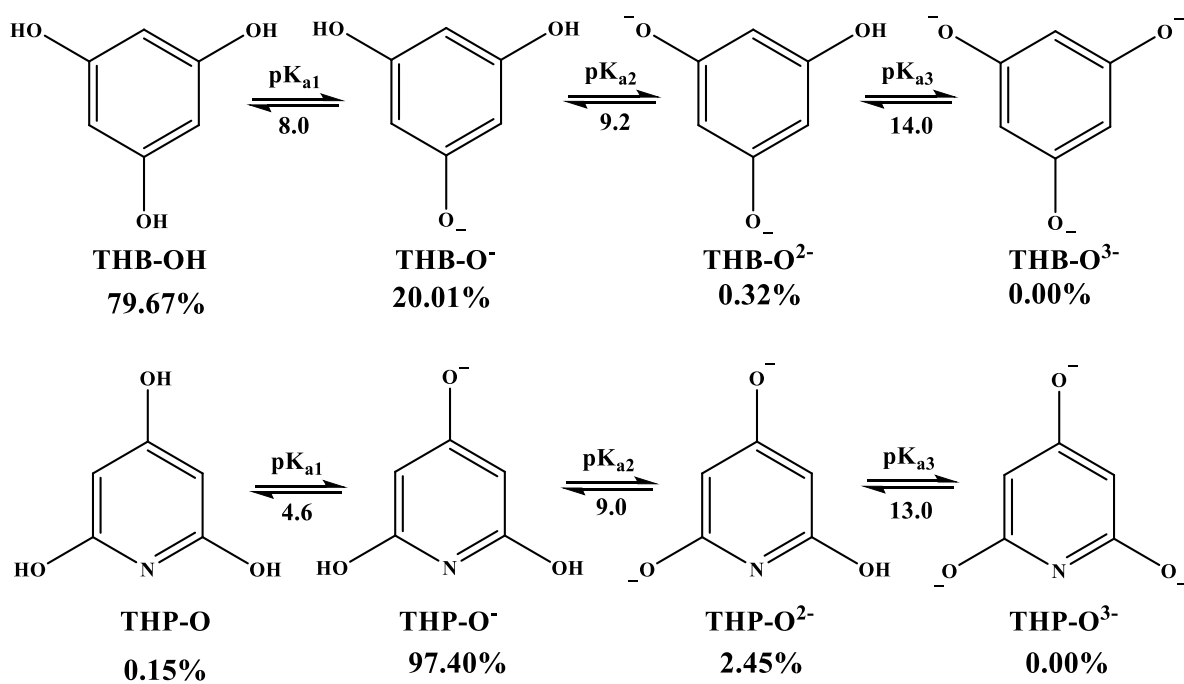

**Fig. S1** Deprotonation sequences,  $pK_a$  values, and molar fractions of the investigated compounds at physiological conditions.

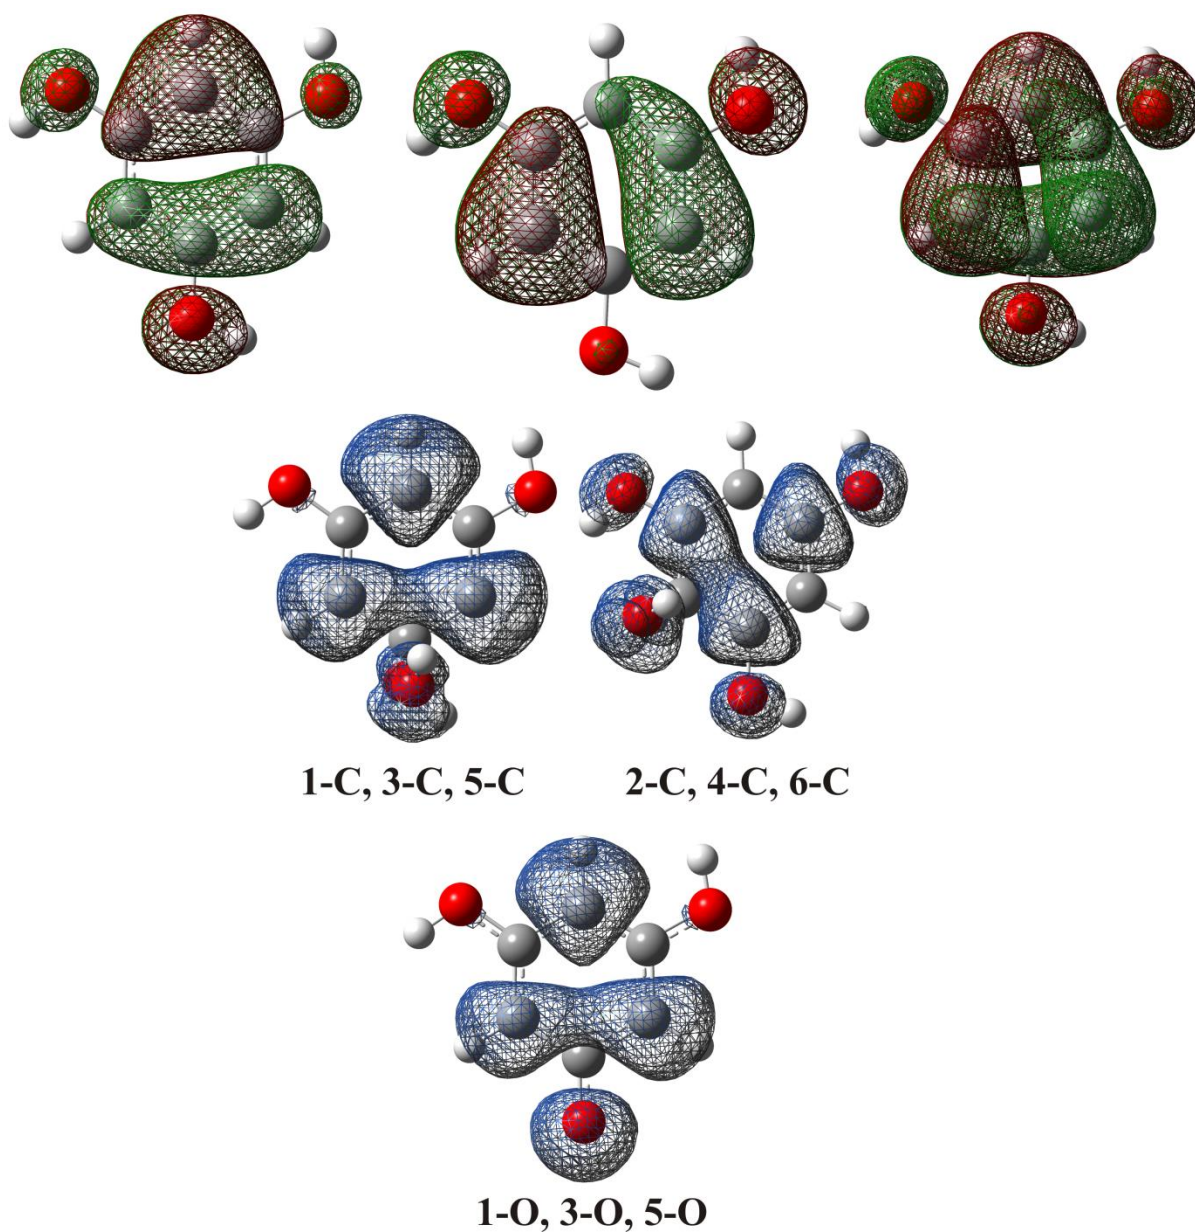

**Fig. S2** Two degenerate HOMOs of **THB-OH** and their superposition (top), spin density surfaces of the **HO-THBO•** radicals formed in the RAF pathways (middle), spin density surface of the **THB-O•** radical formed in the HAT pathway (bottom). All surfaces refer to benzene solution.

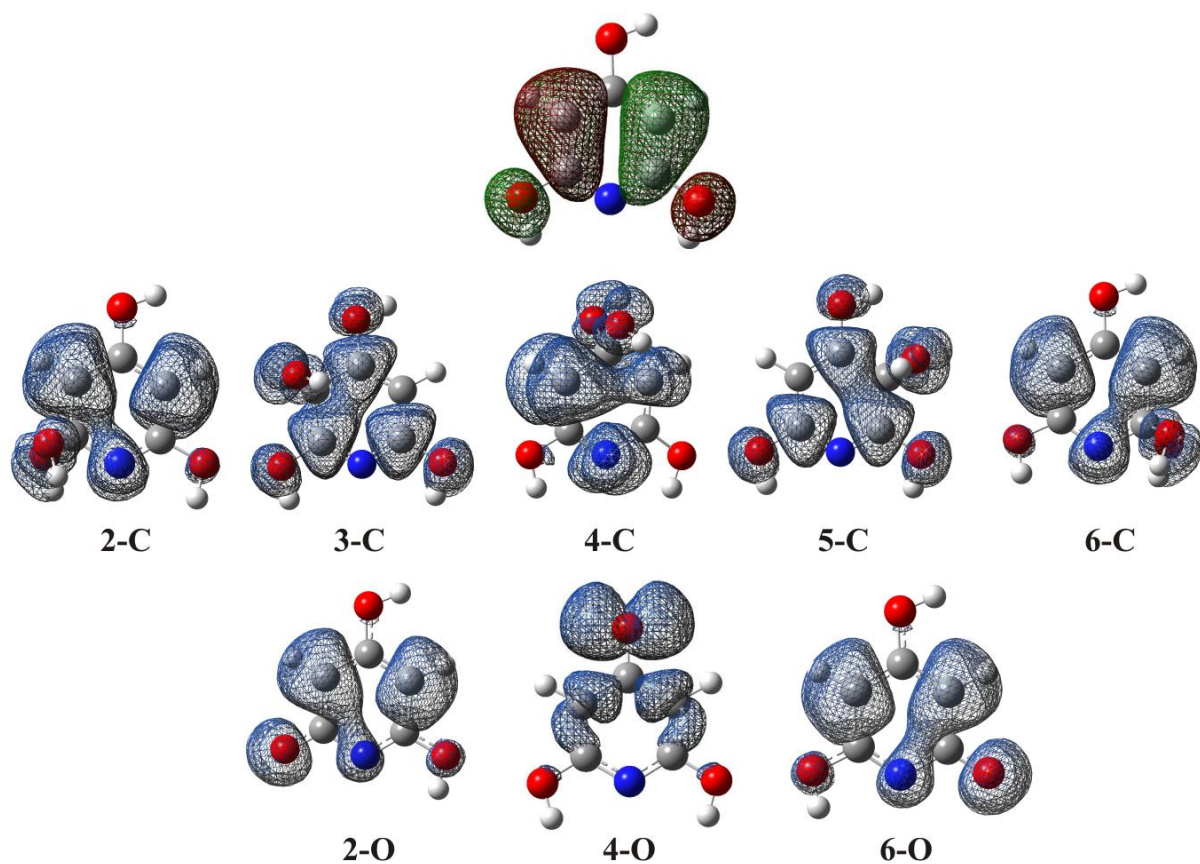

**Fig. S3** HOMO of **THP-OH** (top), spin density surfaces of the **HO-THPO•** radicals formed in the RAF pathways (middle), spin density surfaces of the **THP-O•** radicals formed in the HAT pathway (bottom). All surfaces refer to benzene solution.

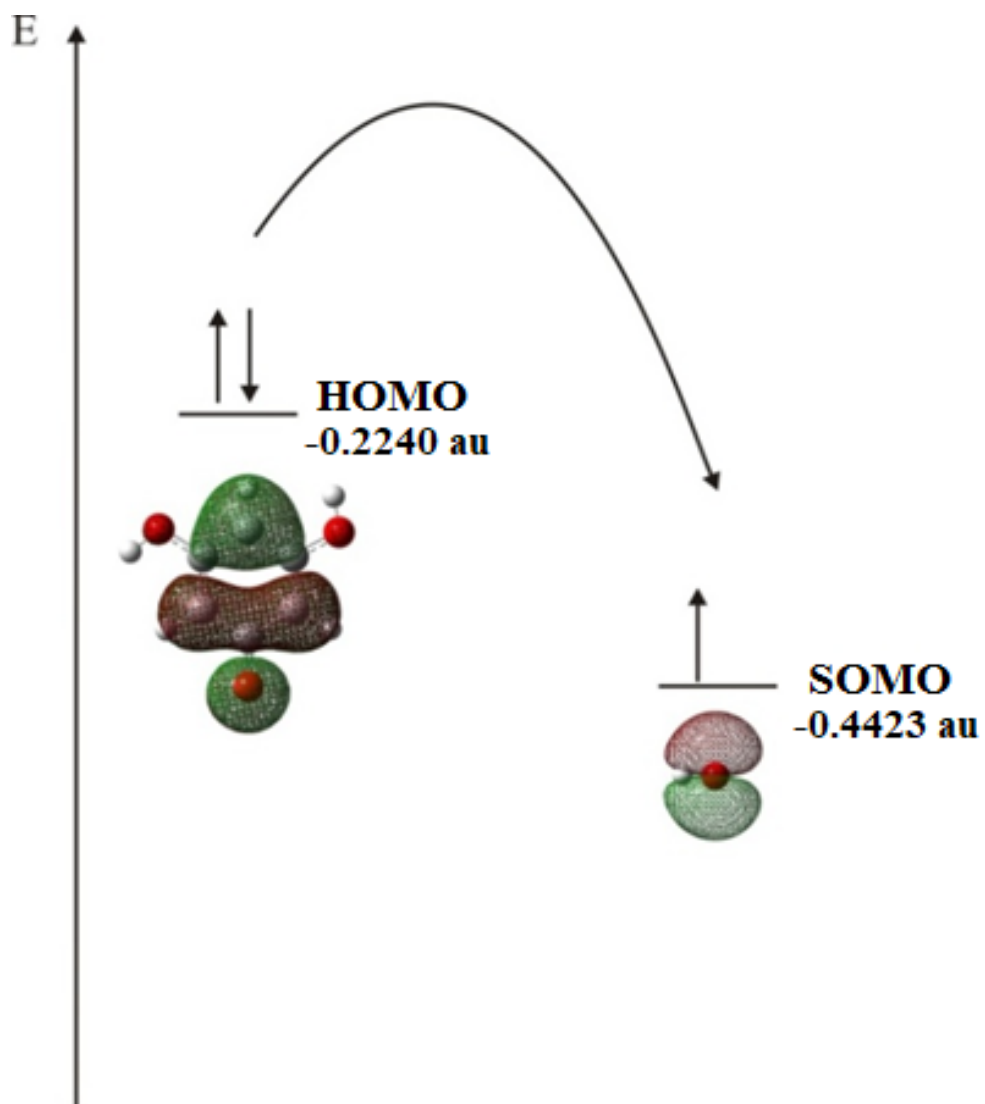

**Fig. S4** Spontaneous electron transfer from the HOMO of the **THB-O<sup>-</sup>** monoanion to the SOMO of **HO<sup>•</sup>**.

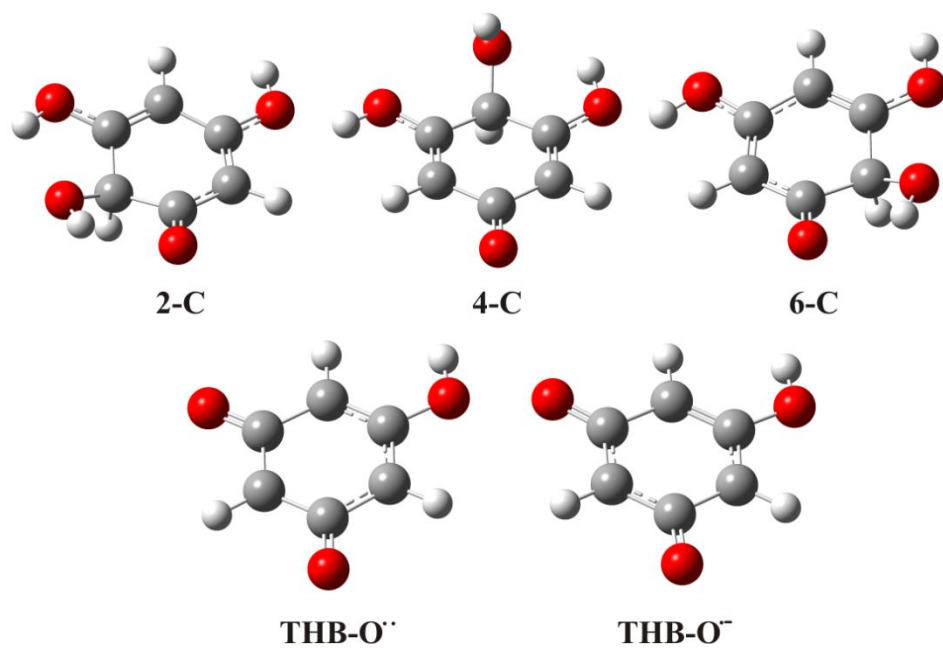

**Fig. S5** Optimized geometries of intermediates and products of the reactions of **THB-O<sup>-</sup>** with **HO<sup>•</sup>** in the aqueous solution formed in: RAF pathways in different positions (**HO-THBO**, top), HAT pathway (**THB-O<sup>•</sup>**) and PT pathway (**THB-O<sup>-</sup>**).

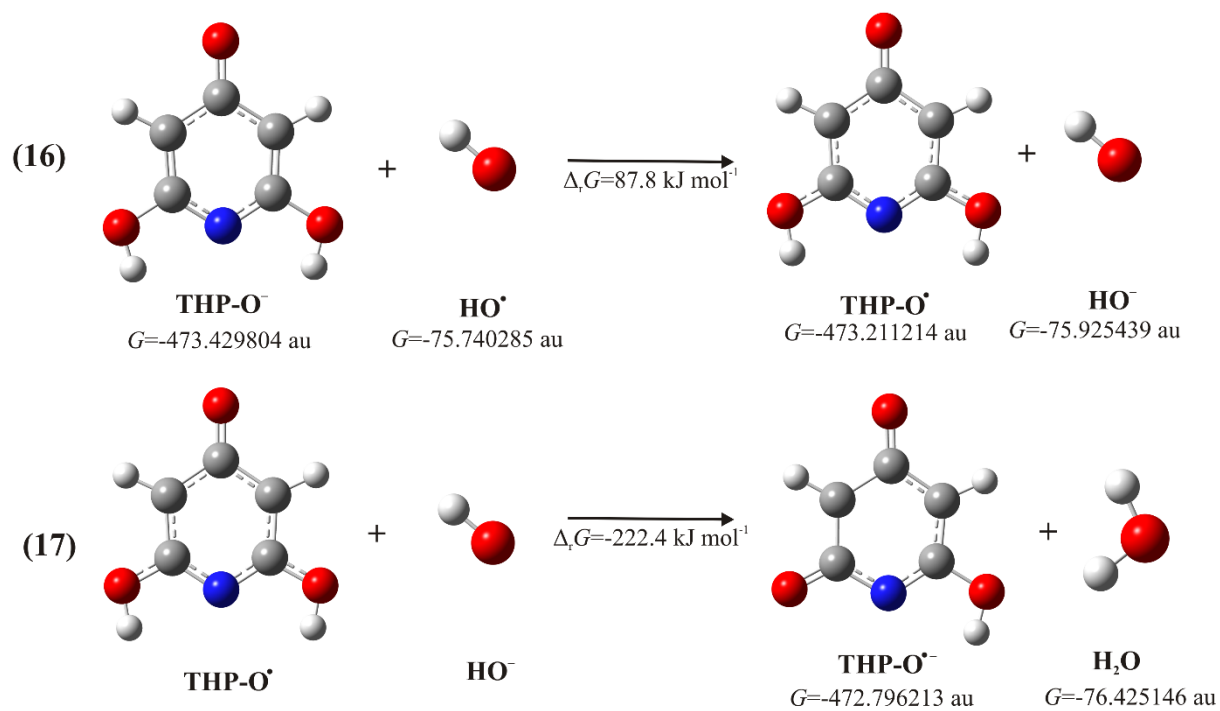

**Fig. S6** The reactions of electron transfer (16) between  $\text{THP-O}^-$  and  $\text{HO}^\bullet$ , and proton transfer (17) between  $\text{THP-O}^\bullet$  and  $\text{HO}^-$  with corresponding Gibbs free energies (au) and reaction free energies ( $\text{kJ mol}^{-1}$ ).

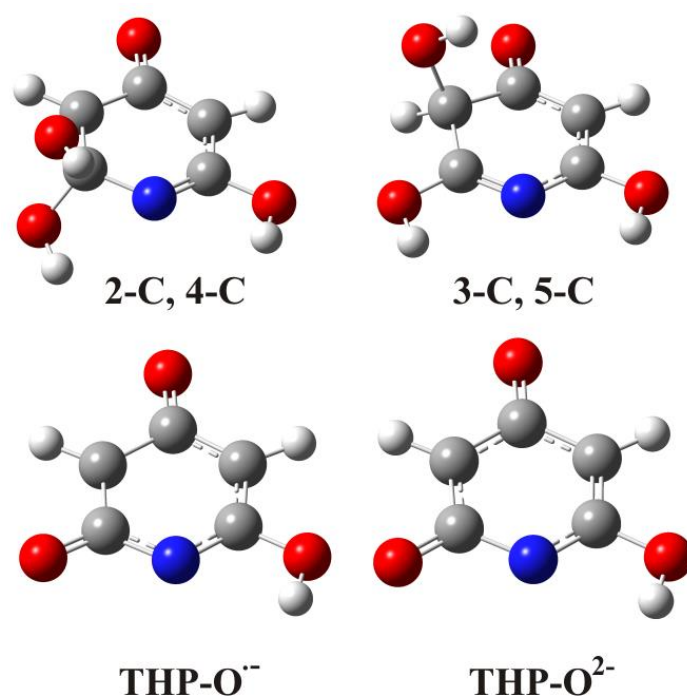

**Fig. S7** Optimized geometries of intermediates and products of the reactions of **THP-O<sup>-</sup>** with **HO<sup>•</sup>** in the aqueous solution formed in: RAF pathways in different positions (**[HO-THP-O]<sup>•-</sup>**, top), HAT pathway (**THP-O<sup>•-</sup>**) and SPL pathway (**THP-O<sup>2-</sup>**).



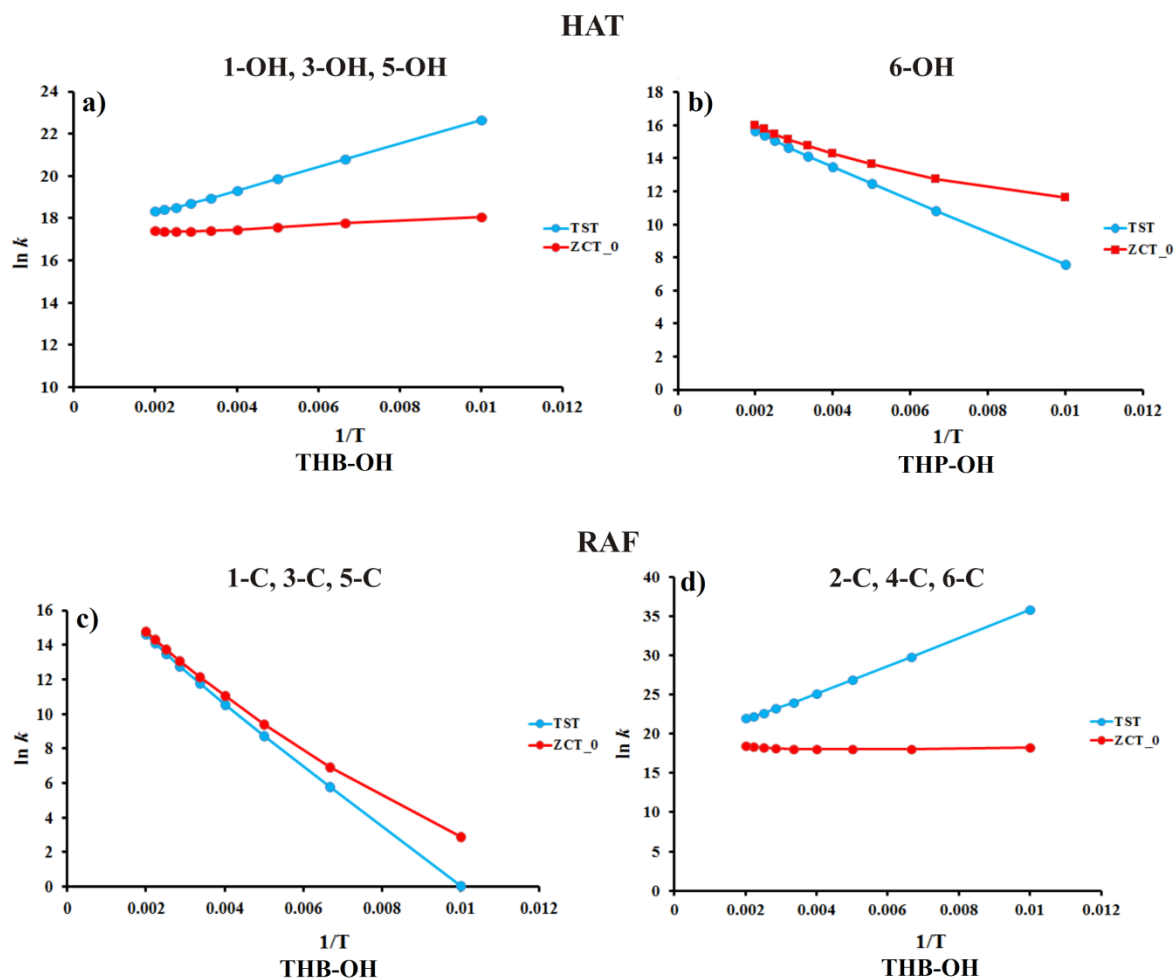

**Fig. S8** Dependence of  $\ln k_{ZCT-0}$  (red) and  $\ln k_{TST}$  (blue) on reciprocal temperature for the reactions of  $\text{HO}^\bullet$  with: a) **THB-OH** in the 1-OH, 3-OH, and 5-OH positions (HAT), b) **THP-OH** in the 6-OH position (HAT), c) **THB-OH** in the 1-C, 3-C, and 5-C positions (RAF), and d) **THB-OH** in the 2-C, 4-C, and 6-C positions (RAF), respectively. All data refer to the benzene solution.

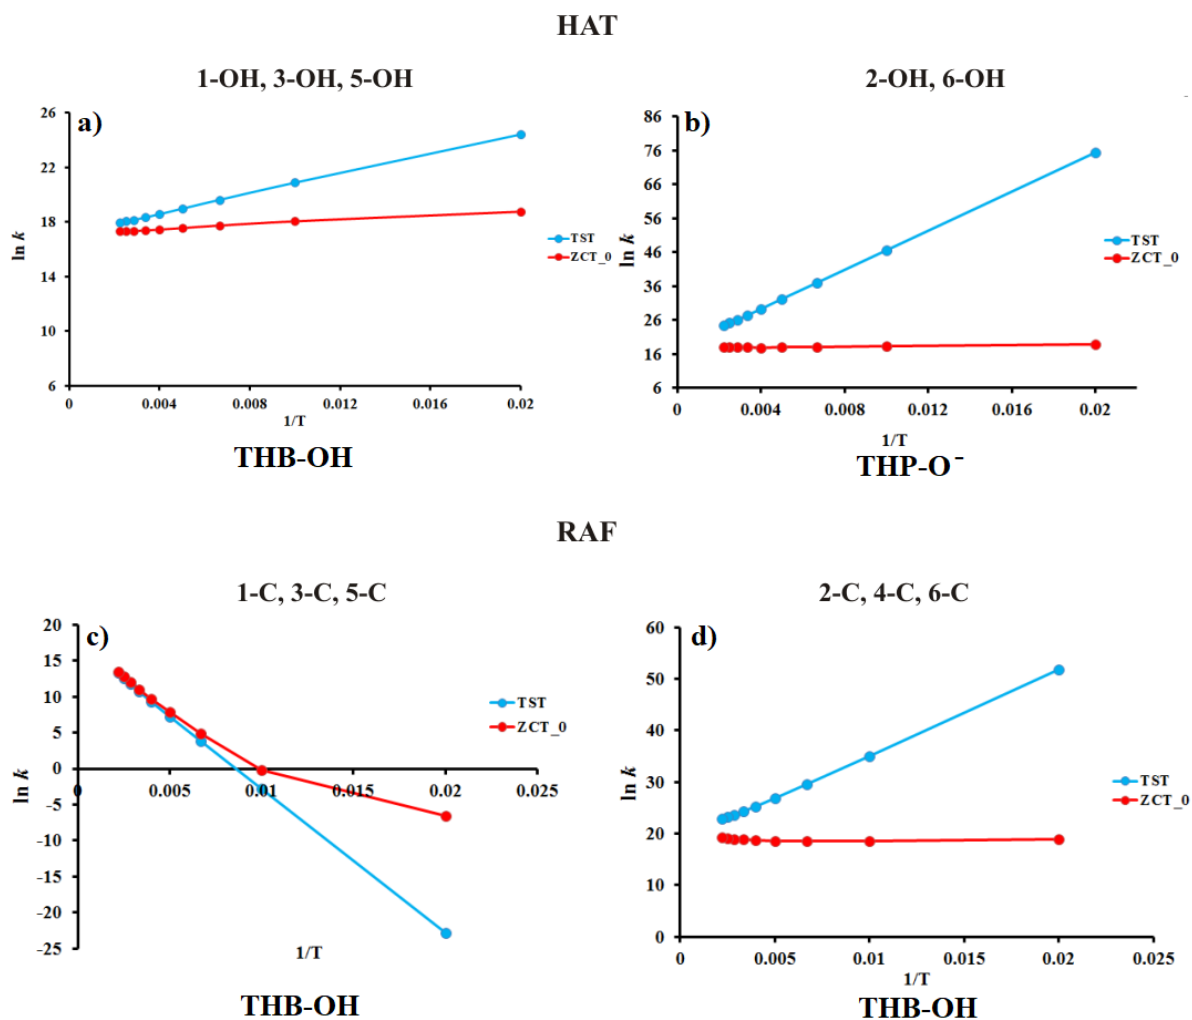

**Fig. S9** Dependence of  $\text{ln } k_{\text{ZCT}_0}$  (red) and  $\text{ln } k_{\text{TST}}$  (blue) on reciprocal temperature for the reactions of  $\text{HO}^\bullet$  with: a) **THB-OH** in the 1-OH, 3-OH, and 5-OH positions (HAT), b) **THP-O<sup>-</sup>** in the 2-OH and 6-OH positions (HAT), c) **THB-OH** in the 1-C, 3-C, and 5-C positions (RAF) and d) **THB-OH** in the 2-C, 4-C, and 6-C positions (RAF), respectively. All data refer to the water solution.

### Comment on Figs. S8 and S9:

Figs. S8 and S9 illustrate the dependence of  $k_{\text{TST}}$  and  $k_{\text{ZCT-0}}$  on temperature. All presented graphs show that the difference between the two rate constants is pronounced at lower temperatures but rapidly decreases with increasing temperature. In some cases (the HAT pathways of **THB-OH** in both solvents and that of **THP-O<sup>-</sup>** in water solution, as well as the RAF reactions of **THB-OH** in the positions 2-C, 4-C, and 6-C in both solvents) the  $k_{\text{TST}}$  values decrease with increasing temperature, and the  $k_{\text{ZCT-0}}$  values are significantly smaller at all temperatures. It is evident that the conventional TST is not adequate for assessing the rates of such HAT and RAF reaction pathways. Bearing in mind that these paths are characterized with extremely small activation energy, the failure of TST can be attributed to the flat potential energy surface.

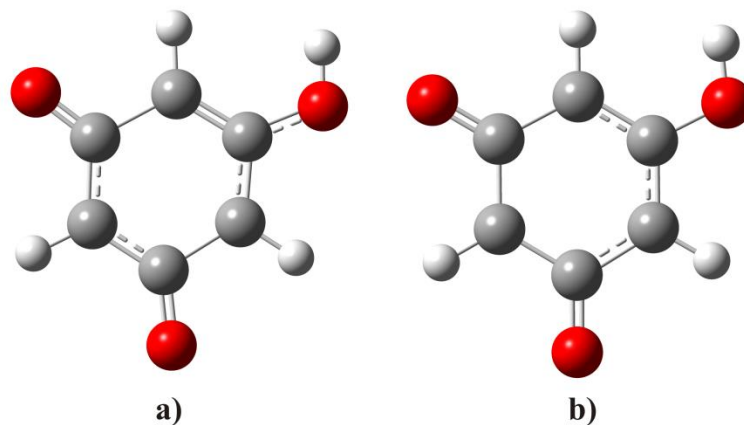

**Fig. S10** Optimized structures of a) **THB=O** (singlet state) and b) **THB-O<sup>••</sup>** (triplet state) in water solution.

**Table S1** Geometrical parameters of a) **THB=O** (singlet state) and b) **THB-O<sup>••</sup>** (triplet state) in water solution.

| <b>Bond lengths<br/>(pm)</b> |           |           | <b>Bond<br/>angles (°)</b> |           |           |
|------------------------------|-----------|-----------|----------------------------|-----------|-----------|
|                              | <b>a)</b> | <b>b)</b> |                            | <b>a)</b> | <b>b)</b> |
| C1-C2                        | 148.8     | 145.0     | O1-C1-C2                   | 128.8     | 120.8     |
| C2-C3                        | 142.3     | 145.0     | C1-C2-C3                   | 120.8     | 121.2     |
| C3-C4                        | 151.6     | 145.0     | C2-C3-O3                   | 125.4     | 120.8     |
| C4-C5                        | 136.2     | 138.8     | C2-C3-C4                   | 120.1     | 117.5     |
| C5-C6                        | 140.7     | 139.7     | O3-C3-C4                   | 114.6     | 121.7     |
| C1-O1                        | 124.8     | 124.1     | C3-C4-C5                   | 120.8     | 121.3     |
| C3-O3                        | 122.8     | 123.9     | C4-C5-O5                   | 126.9     | 122.5     |
| C5-O5                        | 134.4     | 134.7     | C5-C6-C1                   | 126.6     | 121.3     |
|                              |           |           | C6-C1-O1                   | 115.9     | 121.7     |

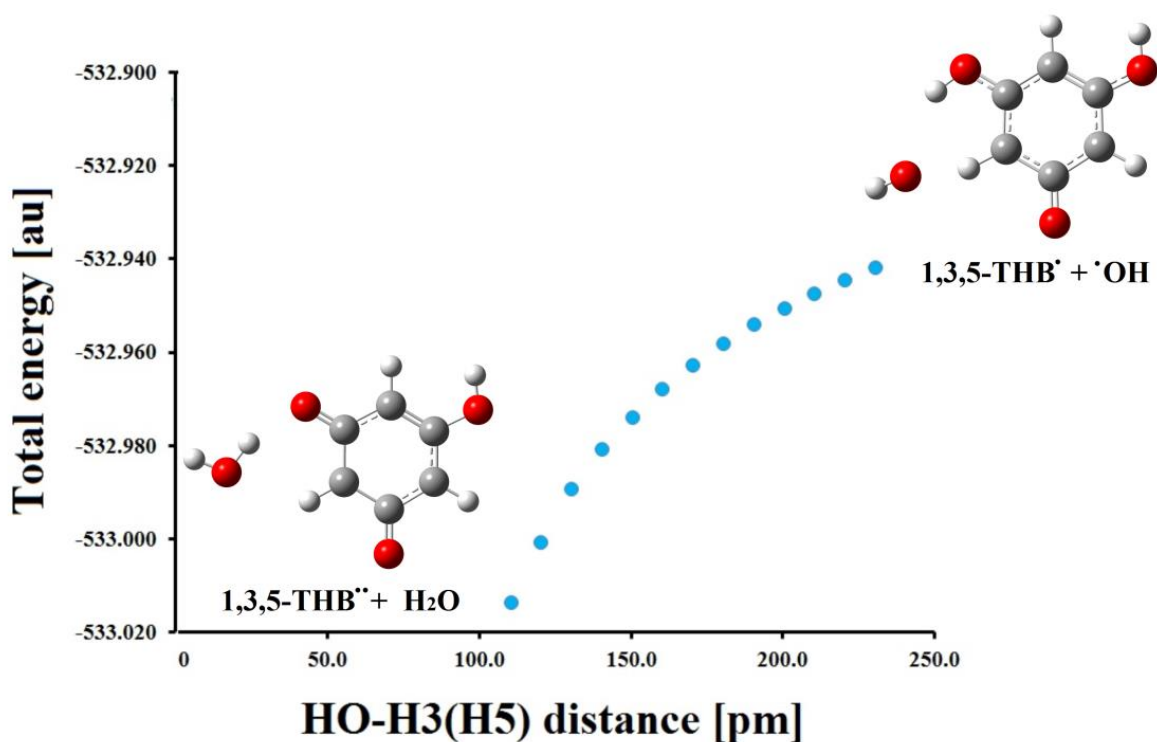

**Fig. S11** Dependence of total energy on the HO-H3(H5) distance in the HAT pathway of THB-O• with HO•.

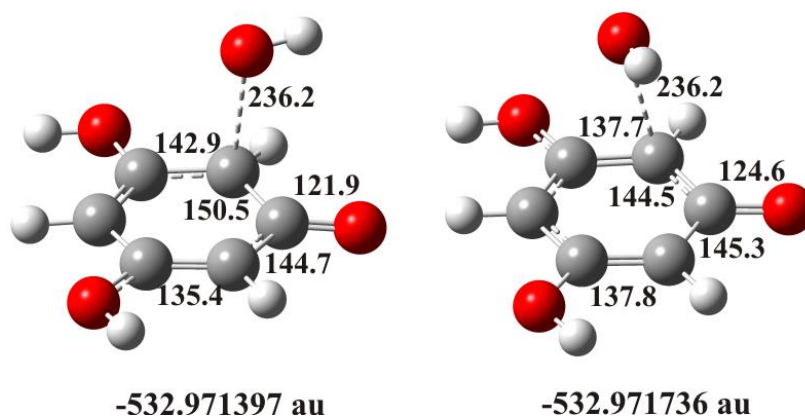

**Fig. S12** Structure of the spin crossing point in the RAF C-6 pathway of THB-O• with HO• in the singlet (left) and triplet (right) states.

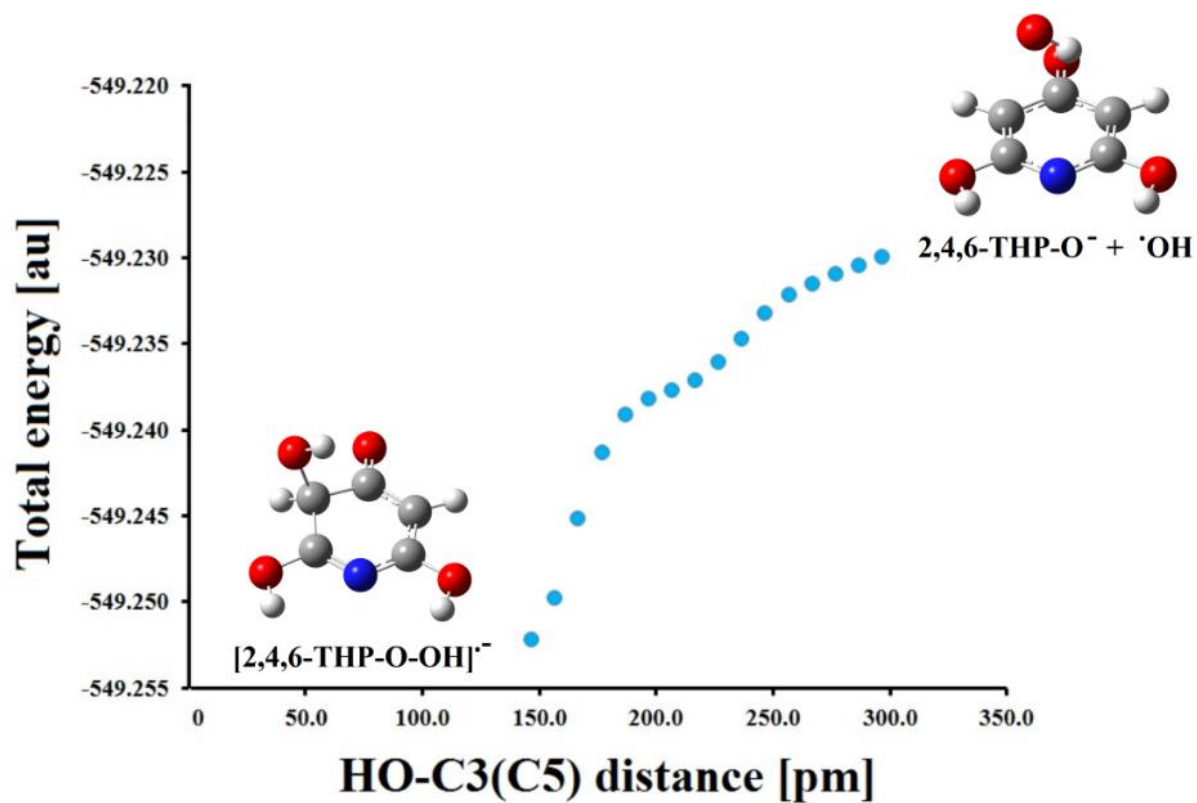

Fig. S13 Dependence of total energy on the HO-C3(C5) distance in the RAF pathway of THP-O<sup>-</sup> and HO<sup>•</sup>.

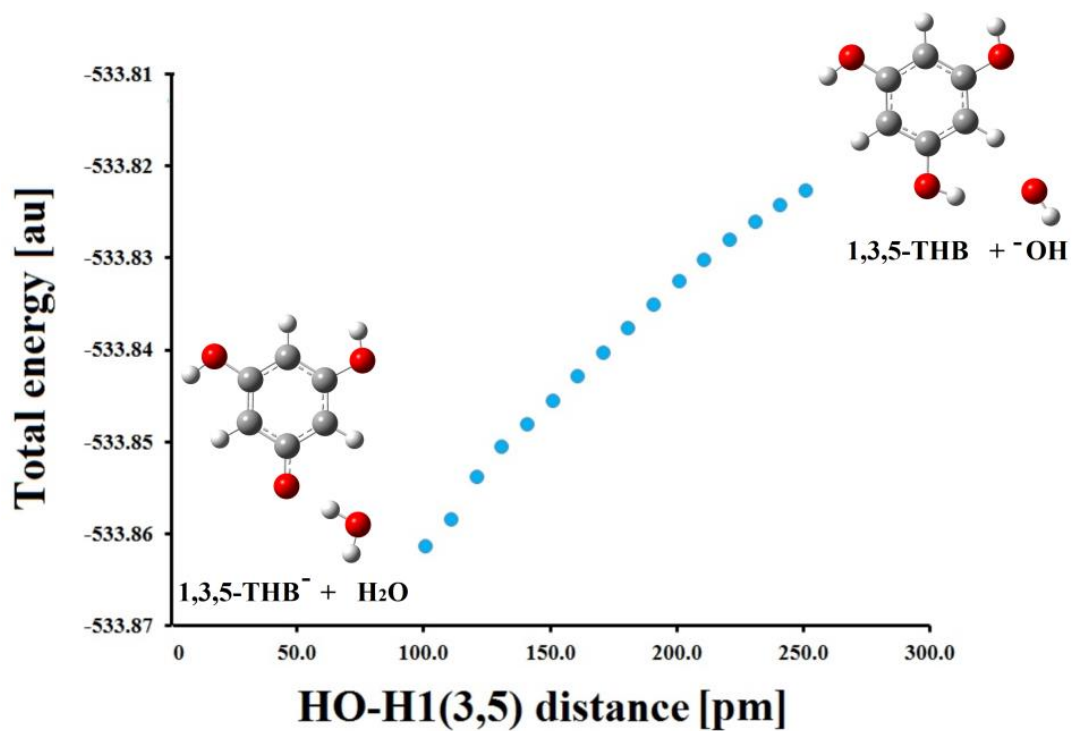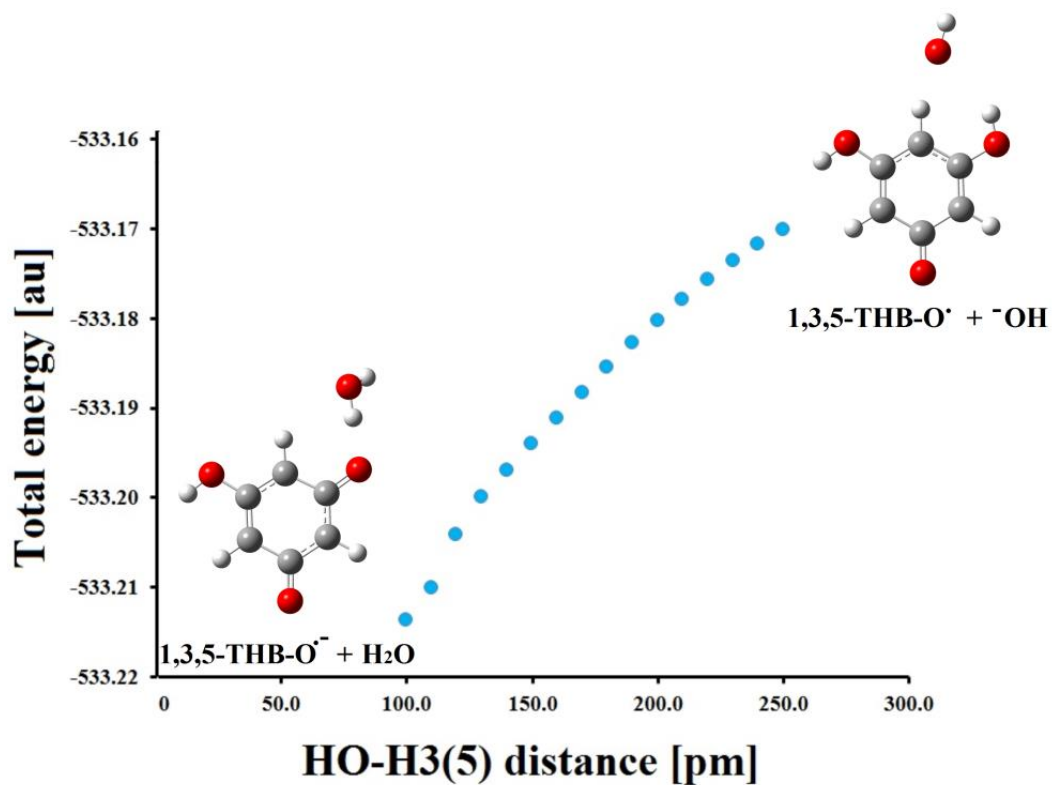

**Fig. S14** Dependence of total energy on the HO–H1(3,5) distance in the proton transfer reaction from **THB-OH** to HO<sup>-</sup> (top), and on the HO– H3(5) distance in the proton transfer reaction from **THB-O<sup>•</sup>** to HO<sup>-</sup> (bottom).

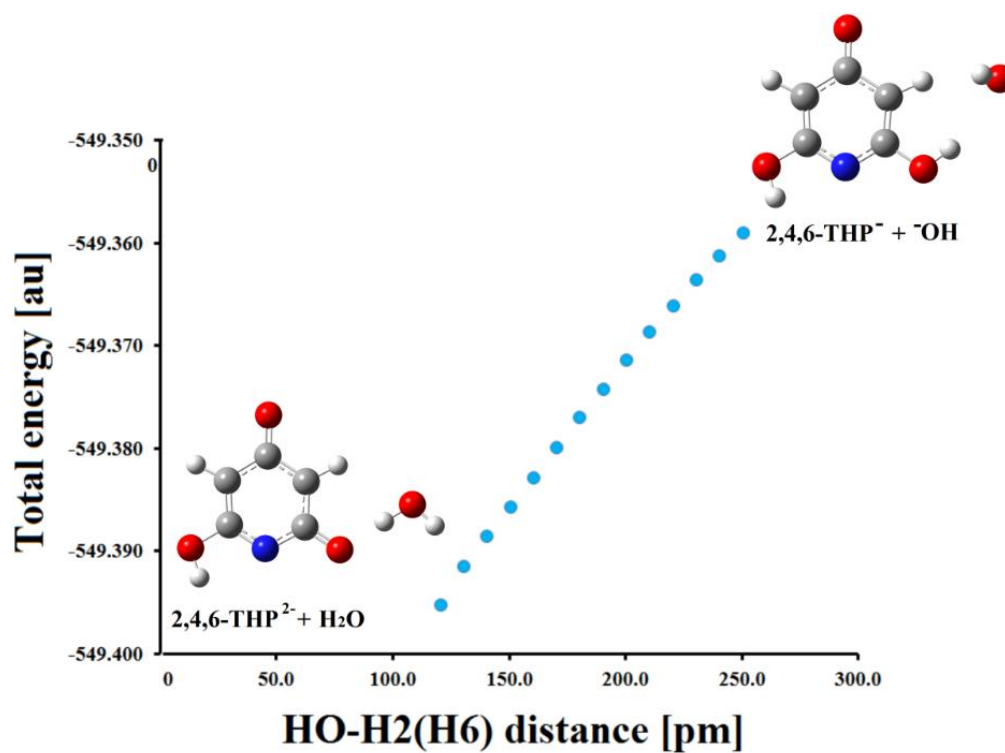

**Fig. S15** Dependence of total energy on the HO– H2(H6) distance in the proton transfer reaction from **THP-O<sup>-</sup>** to HO<sup>-</sup>.



**Table S2** Branching ratios ( $\Gamma$ ) in % for all favorable antioxidative pathways.

| <i>Compound</i>          | <i>Mechanism</i> | <b>BENZENE (<math>\epsilon = 2.2706</math>)</b> |            | <b>WATER (<math>\epsilon = 78.3553</math>)</b> |            |
|--------------------------|------------------|-------------------------------------------------|------------|------------------------------------------------|------------|
|                          |                  | <i>Position</i>                                 | $\Gamma_i$ | <i>Position</i>                                | $\Gamma_i$ |
| <b>THB-OH</b>            | <i>HAT</i>       | <b>1-OH</b>                                     | 11.20      | <b>1-OH</b>                                    | 0.36       |
|                          |                  | <b>3-OH</b>                                     | 11.20      | <b>3-OH</b>                                    | 0.36       |
|                          |                  | <b>5-OH</b>                                     | 11.20      | <b>5-OH</b>                                    | 0.36       |
|                          | <i>RAF</i>       | <b>1-C</b>                                      | 0.10       | <b>1-C</b>                                     | 0.00       |
|                          |                  | <b>2-C</b>                                      | 22.00      | <b>2-C</b>                                     | 1.57       |
|                          |                  | <b>3-C</b>                                      | 0.10       | <b>3-C</b>                                     | 0.00       |
|                          |                  | <b>4-C</b>                                      | 22.00      | <b>4-C</b>                                     | 1.57       |
|                          |                  | <b>5-C</b>                                      | 0.10       | <b>5-C</b>                                     | 0.00       |
|                          |                  | <b>6-C</b>                                      | 22.00      | <b>6-C</b>                                     | 1.57       |
|                          |                  | <i>SPLET</i>                                    | /          | /                                              | <b>SPL</b> |
|                          | <i>SET-PT</i>    | /                                               | /          | <b>ET</b>                                      | 19.67      |
|                          |                  | /                                               | /          | <b>SET</b>                                     |            |
|                          |                  | /                                               | /          | <b>PT</b>                                      | 4.92       |
|                          | <i>SPLET</i>     | /                                               | /          | <b>SPL</b>                                     |            |
| /                        |                  | /                                               | <b>ET</b>  | 20.47                                          |            |
| <i>HAT</i>               |                  | /                                               | /          | <b>3-OH</b>                                    | 4.92       |
|                          |                  | /                                               | /          | <b>5-OH</b>                                    | 4.92       |
|                          |                  | /                                               | /          | <b>1-C</b>                                     | 4.92       |
| <i>RAF</i>               | /                | /                                               | <b>2-C</b> | 4.92                                           |            |
|                          | /                | /                                               | <b>4-C</b> | 4.92                                           |            |
|                          | /                | /                                               | <b>6-C</b> | 4.92                                           |            |
| <b>THP-OH</b>            | <i>HAT</i>       | <b>2-OH</b>                                     | 0.40       | /                                              | /          |
|                          |                  | <b>4-OH</b>                                     | 6.30       | /                                              | /          |
|                          |                  | <b>6-OH</b>                                     | 1.11       | /                                              | /          |
|                          | <i>RAF</i>       | <b>2-C</b>                                      | 0.00       | /                                              | /          |
|                          |                  | <b>3-C</b>                                      | 43.40      | /                                              | /          |
|                          |                  | <b>5-C</b>                                      | 48.80      | /                                              | /          |
|                          |                  | <b>6-C</b>                                      | 0.00       | /                                              | /          |
| <b>THP-O<sup>-</sup></b> | <i>HAT</i>       | /                                               | /          | <b>2-OH</b>                                    | 0.64       |
|                          |                  | /                                               | /          | <b>6-OH</b>                                    | 0.64       |
|                          |                  | /                                               | /          | <b>2-C</b>                                     | 0.50       |
|                          | <i>RAF</i>       | /                                               | /          | <b>3-C</b>                                     | 32.46      |
|                          |                  | /                                               | /          | <b>5-C</b>                                     | 32.46      |
|                          |                  | /                                               | /          | <b>6-C</b>                                     | 0.50       |
|                          |                  | <i>SPLET</i>                                    | /          | /                                              | <b>SPL</b> |
| /                        | /                | <b>ET</b>                                       | 0.35       |                                                |            |

## Cartesian coordinates of equilibrium geometries (benzene)

### THP-OH

$G = -473.878456$  au

| 0 1 | x           | y           | z           |
|-----|-------------|-------------|-------------|
| C   | -0.59354500 | 1.17466100  | -0.00000400 |
| C   | 0.79477800  | 1.14733600  | -0.00002000 |
| C   | 1.39553500  | -0.11003400 | -0.00009700 |
| C   | 0.61761600  | -1.26352100 | -0.00000200 |
| C   | -0.75801300 | -1.08620500 | 0.00006600  |
| N   | -1.36794400 | 0.09587100  | 0.00001300  |
| H   | 1.36376900  | 2.06740200  | -0.00001000 |
| H   | 1.05957600  | -2.24870900 | 0.00000800  |
| O   | 2.73539900  | -0.26695600 | 0.00002500  |
| H   | 3.17230900  | 0.59067100  | 0.00016100  |
| O   | -1.20842400 | 2.37254000  | 0.00001100  |
| H   | -2.16037900 | 2.21238900  | -0.00002600 |
| O   | -1.54402300 | -2.17897600 | -0.00001200 |
| H   | -2.46150800 | -1.87913100 | -0.00006900 |

### THP-O' (2-OH)

$G = -473.232110$  au

| 0 2 | x           | y           | z           |
|-----|-------------|-------------|-------------|
| C   | 0.95110800  | -0.89775300 | 0.00005600  |
| C   | -0.43991100 | -1.26162300 | -0.00004400 |
| C   | -1.36932000 | -0.24292900 | -0.00000800 |
| C   | -0.90976100 | 1.07410200  | -0.00004000 |
| C   | 0.52087800  | 1.35217600  | -0.00039100 |
| N   | 1.42934200  | 0.30157000  | -0.00000400 |
| H   | -0.71100900 | -2.31004000 | -0.00002300 |
| H   | -1.59636500 | 1.90991000  | 0.00011700  |
| O   | -2.70193500 | -0.43905900 | 0.00006100  |
| H   | -2.91160900 | -1.37912100 | 0.00010500  |
| O   | 1.79048900  | -1.93849700 | 0.00002000  |
| H   | 2.69215000  | -1.58755200 | 0.00003800  |
| O   | 0.91188100  | 2.51655300  | 0.00021300  |

### THP-O' (4-OH)

$G = -473.201194$  au

| 0 2 | x           | y           | z           |
|-----|-------------|-------------|-------------|
| C   | -0.66450800 | -1.11204700 | -0.00000300 |
| C   | 0.75429900  | -1.19028300 | -0.00000600 |
| C   | 1.56328900  | -0.00003600 | -0.00000300 |
| C   | 0.75425700  | 1.19029000  | -0.00000200 |

|   |             |             |             |
|---|-------------|-------------|-------------|
| C | -0.66438100 | 1.11215200  | 0.00000700  |
| N | -1.39451800 | -0.00002400 | 0.00000300  |
| H | 1.21632300  | -2.16935700 | -0.00001100 |
| H | 1.21668200  | 2.16915800  | -0.00000800 |
| O | 2.80040800  | 0.00006100  | 0.00000500  |
| O | -1.31257800 | -2.25881600 | 0.00000100  |
| H | -2.26493500 | -2.07755300 | 0.00000500  |
| O | -1.31271900 | 2.25876000  | -0.00000100 |
| H | -2.26507100 | 2.07742400  | -0.00000100 |

### THP-O• (6-OH)

$G = -473.232636$  au

| 0 2 | x           | y           | z           |
|-----|-------------|-------------|-------------|
| C   | -0.38869700 | 1.38665800  | 0.00012300  |
| C   | 1.01004600  | 0.97139500  | 0.00000300  |
| C   | 1.33917100  | -0.37481700 | -0.00002100 |
| C   | 0.31055800  | -1.30428100 | 0.00002400  |
| C   | -1.03772600 | -0.81134000 | 0.00007100  |
| N   | -1.39557200 | 0.43030300  | 0.00003700  |
| H   | 1.75809200  | 1.75497600  | -0.00003900 |
| H   | 0.50132400  | -2.36859800 | 0.00000700  |
| O   | 2.60466800  | -0.83952600 | 0.00000500  |
| H   | 3.23580800  | -0.11209600 | 0.00006200  |
| O   | -0.66519900 | 2.58289300  | -0.00009700 |
| O   | -1.97542600 | -1.76398400 | -0.00007900 |
| H   | -2.83866700 | -1.32715000 | -0.00012000 |

### THP-O<sup>-</sup> (2-OH)

$G = -473.382725$  au

| -1 1 | x           | y           | z           |
|------|-------------|-------------|-------------|
| C    | 0.85817200  | -0.96464700 | -0.00004100 |
| C    | -0.49856600 | -1.27266700 | 0.00007000  |
| C    | -1.35418100 | -0.16016700 | 0.00002200  |
| C    | -0.85957500 | 1.12012200  | 0.00007400  |
| C    | 0.56535700  | 1.34521100  | 0.00051000  |
| N    | 1.39489300  | 0.23414400  | 0.00005600  |
| H    | -0.85063000 | -2.29559800 | 0.00003500  |
| H    | -1.52652900 | 1.97199700  | -0.00015700 |
| O    | -2.71539900 | -0.33376500 | -0.00005000 |
| H    | -2.90446900 | -1.27608500 | -0.00000100 |
| O    | 1.73785800  | -2.01522500 | -0.00011100 |
| H    | 2.61135100  | -1.60488800 | -0.00014400 |
| O    | 1.05738900  | 2.49379700  | -0.00033100 |

**THP-O<sup>-</sup> (4-OH)** $G = -473.389300$  au

| -1 1 | x           | y           | z           |
|------|-------------|-------------|-------------|
| C    | -0.61758400 | -1.12961100 | -0.00000700 |
| C    | 0.75255100  | -1.21007800 | 0.00001300  |
| C    | 1.53477600  | 0.00140400  | 0.00013300  |
| C    | 0.74978200  | 1.21163600  | 0.00000300  |
| C    | -0.61991300 | 1.12868000  | -0.00003700 |
| N    | -1.33906300 | -0.00146200 | -0.00000200 |
| H    | 1.24684800  | -2.17271800 | -0.00003600 |
| H    | 1.24308300  | 2.17477100  | -0.00004200 |
| O    | 2.79171700  | 0.00299100  | -0.00005200 |
| O    | -1.35309200 | -2.28417000 | -0.00001400 |
| H    | -2.27590700 | -2.00604300 | 0.00000800  |
| O    | -1.35835400 | 2.28134000  | -0.00000500 |
| H    | -2.28042400 | 2.00074800  | 0.00002600  |

**THP-O<sup>-</sup> (6-OH)** $G = -473.384238$  au

| -1 1 | x           | y           | z           |
|------|-------------|-------------|-------------|
| C    | -0.35794700 | 1.40248500  | 0.00013100  |
| C    | 1.01474900  | 0.95702200  | 0.00002900  |
| C    | 1.30619400  | -0.38748200 | 0.00001400  |
| C    | 0.29213600  | -1.35175600 | 0.00002200  |
| C    | -0.99870900 | -0.83581800 | -0.00001500 |
| N    | -1.34595200 | 0.43384700  | 0.00000400  |
| H    | 1.79865800  | 1.70653700  | -0.00001900 |
| H    | 0.49504000  | -2.41205300 | 0.00001700  |
| O    | 2.59730700  | -0.84974100 | 0.00001500  |
| H    | 3.18918600  | -0.09166600 | 0.00004000  |
| O    | -0.66120500 | 2.61510900  | -0.00009500 |
| O    | -2.03218900 | -1.73457300 | -0.00005400 |
| H    | -2.83106900 | -1.19281100 | -0.00007200 |

**[HO-THP-OH]<sup>•</sup> (2-OH)** $G = -549.628538$  au

| 0 2 | x           | y           | z           |
|-----|-------------|-------------|-------------|
| C   | -0.27176100 | 1.40057200  | 0.00009500  |
| C   | -1.48237300 | 0.61478000  | 0.00011800  |
| C   | -1.35777800 | -0.76220100 | 0.00016000  |
| C   | -0.09750800 | -1.33439900 | -0.00007200 |
| C   | 1.13094400  | -0.47263000 | 0.00012100  |
| N   | 0.92674100  | 0.95576500  | 0.00028600  |
| H   | -2.43786000 | 1.12241700  | 0.00055300  |

|   |             |             |             |
|---|-------------|-------------|-------------|
| H | 0.03800600  | -2.40749200 | -0.00079100 |
| O | -2.42185800 | -1.60015000 | 0.00006200  |
| H | -3.24396000 | -1.09956900 | -0.00145000 |
| O | -0.48789500 | 2.72870200  | -0.00000900 |
| H | 0.37404400  | 3.16546200  | 0.00016100  |
| O | 1.85318500  | -0.81388300 | -1.15768500 |
| H | 2.43862800  | -0.07332400 | -1.35690800 |
| O | 1.85346200  | -0.81463700 | 1.15726500  |
| H | 2.43965400  | -0.07483700 | 1.35684700  |

### [HO-THP-OH]<sup>•</sup> (3-OH)

$G = -549.626702$  au

| 0 2 | x           | y           | z           |
|-----|-------------|-------------|-------------|
| C   | -1.54659200 | -0.33234100 | 0.07369200  |
| C   | -0.63891400 | -1.40334100 | -0.04354300 |
| C   | 0.68291900  | -1.11897500 | -0.22608200 |
| C   | 1.21194400  | 0.27422600  | -0.14478000 |
| C   | 0.06487300  | 1.23495800  | -0.23124600 |
| N   | -1.19553600 | 0.95316100  | -0.05593300 |
| H   | -1.01088400 | -2.42067600 | -0.02137300 |
| H   | 1.92727800  | 0.46556800  | -0.95046500 |
| O   | 1.64990500  | -2.03936300 | -0.43079600 |
| H   | 1.27185200  | -2.92510100 | -0.45183800 |
| O   | -2.84962400 | -0.61042700 | 0.29017300  |
| H   | -3.32852200 | 0.22710900  | 0.30774800  |
| O   | 0.43612500  | 2.50447800  | -0.45800200 |
| H   | -0.35914500 | 3.05337600  | -0.46821400 |
| O   | 1.98777300  | 0.48476700  | 1.04849400  |
| H   | 1.42935300  | 0.28478900  | 1.80846700  |

### [HO-THP-OH]<sup>•</sup> (4-OH)

$G = -549.615301$  au

| 0 2 | x           | y           | z           |
|-----|-------------|-------------|-------------|
| C   | 0.85008400  | 1.18600400  | -0.01659900 |
| C   | -0.49166600 | 1.23323000  | -0.02774700 |
| C   | -1.29350700 | -0.02967700 | -0.01790300 |
| C   | -0.41462500 | -1.24327600 | -0.04265500 |
| C   | 0.99133600  | -1.10699800 | -0.00828600 |
| N   | 1.61872300  | 0.03144000  | 0.00398100  |
| H   | -1.01572100 | 2.18046000  | -0.04690400 |
| H   | -0.88283200 | -2.21788900 | -0.06997900 |
| O   | -2.15229200 | -0.15410100 | -1.12074800 |
| H   | -2.76743400 | 0.58863600  | -1.10251000 |
| O   | 1.58393400  | 2.32053300  | -0.02221700 |

|   |             |             |             |
|---|-------------|-------------|-------------|
| H | 2.51415300  | 2.06643400  | -0.01817500 |
| O | 1.70170100  | -2.24722500 | 0.00731000  |
| H | 2.63929900  | -2.01394800 | 0.01655500  |
| O | -2.13260000 | -0.09347600 | 1.13626500  |
| H | -1.67420600 | 0.33468700  | 1.86740400  |

**[HO-THP-OH]<sup>+</sup> (5-OH)**

$G = -549.628487$  au

| 0 2 | x           | y           | z           |
|-----|-------------|-------------|-------------|
| C   | -0.06403400 | 1.22925400  | -0.15496500 |
| C   | -1.16862900 | 0.22613700  | -0.27436800 |
| C   | -0.60357800 | -1.15400500 | -0.17119900 |
| C   | 0.72433000  | -1.40048300 | -0.02044200 |
| C   | 1.60443400  | -0.30122800 | 0.05169400  |
| N   | 1.20507600  | 0.97408000  | -0.00620200 |
| H   | -1.69367800 | 0.36243700  | -1.23177900 |
| H   | 1.10228300  | -2.41102400 | 0.05644700  |
| O   | -1.49760900 | -2.16334200 | -0.25344600 |
| H   | -2.38114100 | -1.80793300 | -0.09210800 |
| O   | -0.48119500 | 2.50273400  | -0.25539700 |
| H   | 0.29262200  | 3.07726100  | -0.18691300 |
| O   | 2.92280100  | -0.54027800 | 0.21126800  |
| H   | 3.37430700  | 0.31161200  | 0.24801100  |
| O   | -2.22493500 | 0.40870700  | 0.68470200  |
| H   | -1.83755100 | 0.38847100  | 1.56842100  |

**[HO-THP-OH]<sup>+</sup> (6-OH)**

$G = -549.628584$  au

| 0 2 | x           | y           | z           |
|-----|-------------|-------------|-------------|
| C   | -1.10175500 | -0.51625200 | 0.00002200  |
| C   | 0.16523800  | -1.32223500 | 0.00065300  |
| C   | 1.39004500  | -0.70017800 | 0.00007000  |
| C   | 1.45423400  | 0.68955000  | -0.00030200 |
| C   | 0.21292200  | 1.42137000  | 0.00011100  |
| N   | -0.96430800 | 0.91924200  | 0.00040700  |
| H   | 0.05522500  | -2.40018000 | 0.00129200  |
| H   | 2.39592400  | 1.21925000  | -0.00077600 |
| O   | 2.56817100  | -1.37145200 | 0.00015700  |
| H   | 2.41027600  | -2.32092400 | 0.00006300  |
| O   | -1.80737700 | -0.89037100 | -1.15780700 |
| H   | -2.43057600 | -0.18071500 | -1.35484800 |
| O   | 0.36590100  | 2.75770500  | 0.00018700  |
| H   | -0.51490600 | 3.15479700  | 0.00039300  |
| O   | -1.80899600 | -0.89085500 | 1.15667900  |

H -2.43148700 -0.18067400 1.35397600

### THB-OH

$G = -457.800070$  au

| 0 1 | x           | y           | z           |
|-----|-------------|-------------|-------------|
| C   | -1.06921500 | 0.90587400  | 0.00000700  |
| C   | 0.24375100  | 1.35957300  | 0.00000100  |
| C   | 1.31906700  | 0.47288500  | 0.00000700  |
| C   | 1.05576800  | -0.89111100 | 0.00000400  |
| C   | -0.25008700 | -1.37905300 | -0.00000800 |
| C   | -1.29944000 | -0.46887500 | 0.00000000  |
| H   | -1.90898600 | 1.59024000  | 0.00001500  |
| H   | 2.33161800  | 0.85846900  | 0.00001200  |
| H   | -0.42292800 | -2.44852600 | -0.00003100 |
| O   | 2.05211700  | -1.81645000 | 0.00001000  |
| H   | 2.90732600  | -1.37609900 | -0.00008200 |
| O   | 0.54752100  | 2.68497200  | -0.00000300 |
| H   | -0.26093700 | 3.20638100  | -0.00002300 |
| O   | -2.59928100 | -0.86817700 | -0.00000800 |
| H   | -2.64801000 | -1.82898900 | 0.00005300  |

### THB-O<sup>•</sup> (1-OH, 3-OH, 5-OH)

$G = -473.232110$  au

| 0 2 | x           | y           | z           |
|-----|-------------|-------------|-------------|
| C   | 1.16758400  | 0.86382500  | -0.00000900 |
| C   | -0.14139400 | 1.48320400  | -0.00000200 |
| C   | -1.31001200 | 0.62453400  | -0.00000100 |
| C   | -1.15453400 | -0.73357600 | 0.00000300  |
| C   | 0.13520300  | -1.31466400 | 0.00000700  |
| C   | 1.28301600  | -0.50579000 | -0.00000300 |
| H   | 2.04336500  | 1.49986600  | -0.00001600 |
| H   | -2.28533400 | 1.09701600  | -0.00000400 |
| H   | 0.21402400  | -2.39655300 | 0.00001900  |
| O   | -2.18165300 | -1.61832700 | 0.00000300  |
| H   | -3.02334500 | -1.15091800 | 0.00006500  |
| O   | -0.25859000 | 2.72205800  | -0.00000200 |
| O   | 2.52687600  | -1.04706800 | -0.00000100 |
| H   | 2.47903700  | -2.00790800 | -0.00003700 |

### THB-O<sup>-</sup> (1-OH, 3-OH, 5-OH)

$G = -473.232110$  au

| -1 1 | x           | y          | z           |
|------|-------------|------------|-------------|
| C    | 1.05791600  | 0.96526700 | -0.00000800 |
| C    | -0.28176400 | 1.48583600 | -0.00000300 |

|   |             |             |             |
|---|-------------|-------------|-------------|
| C | -1.32584200 | 0.49262800  | 0.00000200  |
| C | -1.03667700 | -0.85744600 | 0.00000700  |
| C | 0.27249400  | -1.34520200 | 0.00000500  |
| C | 1.29834700  | -0.39389400 | -0.00000400 |
| H | 1.89123600  | 1.65818400  | -0.00001600 |
| H | -2.35658300 | 0.83717600  | 0.00000000  |
| H | 0.46631600  | -2.41118600 | 0.00001500  |
| O | -2.04051000 | -1.80450200 | 0.00001100  |
| H | -2.88374200 | -1.34322100 | 0.00004900  |
| O | -0.53271000 | 2.72765100  | -0.00000600 |
| O | 2.61602700  | -0.80541500 | -0.00000600 |
| H | 2.63347100  | -1.76595400 | -0.00003400 |

### **[HO-THB-OH]<sup>+</sup> (1-OH, 3-OH, 5-OH)**

$G = -533.548846$  au

| 0 2 | x           | y           | z           |
|-----|-------------|-------------|-------------|
| C   | -0.43362300 | -1.25309200 | -0.02050100 |
| C   | -1.26514800 | -0.00166600 | -0.01617000 |
| C   | -0.45269200 | 1.25779900  | -0.02232700 |
| C   | 0.89919300  | 1.23278400  | -0.00712200 |
| C   | 1.62486000  | 0.00714800  | -0.00096000 |
| C   | 0.92613900  | -1.22012000 | -0.01284400 |
| H   | -0.96209500 | -2.19994600 | -0.02660400 |
| H   | -1.01569500 | 2.18438900  | -0.03500500 |
| H   | 2.70777700  | 0.04189000  | 0.00822900  |
| O   | 1.68324800  | 2.34777400  | 0.00521400  |
| H   | 1.13083300  | 3.13527400  | -0.02933700 |
| O   | -2.11714600 | 0.05364000  | -1.13513400 |
| H   | -2.74164600 | -0.67830400 | -1.06379700 |
| O   | 1.60400600  | -2.40450700 | -0.01108700 |
| H   | 2.55221100  | -2.24565800 | -0.02500600 |
| O   | -2.15005500 | -0.02314000 | 1.10938700  |
| H   | -1.62418200 | -0.16490900 | 1.90403000  |

### **[HO-THB-OH]<sup>+</sup> (2-OH, 4-OH, 6-OH)**

$G = -533.552767$  au

| 0 2 | x           | y           | z           |
|-----|-------------|-------------|-------------|
| C   | -1.02269700 | 1.19708000  | -0.00125600 |
| C   | 0.33131200  | 1.24989900  | -0.14851400 |
| C   | 1.19506000  | 0.03712100  | -0.26814700 |
| C   | 0.38839900  | -1.22031400 | -0.17927800 |
| C   | -0.96624800 | -1.25250000 | -0.03376700 |
| C   | -1.68822800 | -0.04562600 | 0.04780400  |
| H   | -1.61076600 | 2.10641100  | 0.06284400  |



|   |             |             |             |
|---|-------------|-------------|-------------|
| H | 1.74610100  | 0.06867700  | -1.22054800 |
| H | -1.47003700 | -2.21075400 | 0.03340700  |
| O | 1.09955100  | -2.37266900 | -0.26846900 |
| H | 2.02186100  | -2.17448800 | -0.06077600 |
| O | 1.04612000  | 2.39949300  | -0.25399900 |
| H | 0.46083700  | 3.16088300  | -0.18436100 |
| O | -3.03922000 | -0.01261600 | 0.20682500  |
| H | -3.39293000 | -0.90719600 | 0.20903500  |
| O | 2.26262800  | -0.00261400 | 0.70079800  |
| H | 1.86672100  | 0.06975600  | 1.57811100  |

### Cartesian coordinates of transition states (benzene)

#### THP-O<sup>•</sup> (2-OH)

$G = -549.597810$  au

| 0 2 | x           | y           | z           |
|-----|-------------|-------------|-------------|
| H   | -2.26561100 | -1.27501800 | 0.09089400  |
| O   | -1.47776800 | -1.86726500 | -0.36775100 |
| C   | -0.53114800 | -0.98330000 | -0.34645100 |
| C   | -0.92144600 | 0.39957500  | -0.45970500 |
| C   | 1.60982200  | -0.40787900 | 0.09141400  |
| C   | 0.05330400  | 1.37282900  | -0.13183300 |
| O   | -2.72392600 | -0.13908800 | 0.73134700  |
| H   | -2.42684800 | -0.10059700 | 1.64951000  |
| O   | -0.33832400 | 2.65316900  | -0.19252500 |
| H   | 0.39923500  | 3.24513300  | -0.00681400 |
| O   | 2.87271100  | -0.77745300 | 0.29373600  |
| H   | 2.91477300  | -1.74193500 | 0.22698500  |
| H   | -1.77872900 | 0.68779800  | -1.04810900 |
| C   | 1.33471700  | 0.97276000  | 0.17248600  |
| N   | 0.72736900  | -1.36589000 | -0.14094700 |
| H   | 2.13255300  | 1.66704000  | 0.40024600  |

#### THP-O<sup>•</sup> (4-OH)

$G = -549.600153$  au

| 0 2 | x           | y           | z           |
|-----|-------------|-------------|-------------|
| H   | -2.47962300 | -0.91086300 | 0.14581400  |
| O   | -1.80650900 | -1.66111700 | -0.35700200 |
| C   | -0.72448700 | -0.94687800 | -0.35026800 |
| C   | 0.55315000  | -1.46166400 | -0.15511400 |
| C   | -0.88660700 | 0.48451900  | -0.45060100 |
| C   | 1.57473200  | -0.54955900 | 0.07884700  |
| C   | 0.25409600  | 1.27939500  | -0.15254600 |

|   |             |             |             |
|---|-------------|-------------|-------------|
| O | -2.73819600 | 0.22958700  | 0.74622300  |
| H | -2.43629700 | 0.20999300  | 1.66314600  |
| H | 0.73320500  | -2.52411300 | -0.08355000 |
| N | 1.44338300  | 0.79070600  | 0.11571300  |
| O | 0.09933700  | 2.59959700  | -0.19234200 |
| H | 0.95502300  | 3.01325900  | -0.01243300 |
| O | 2.79548300  | -1.01930100 | 0.32721500  |
| H | 3.38019600  | -0.26858600 | 0.49733900  |
| H | -1.68241700 | 0.92036200  | -1.03497100 |

### THP-O• (6-OH)

$G = -549.598800$  au

| 0 2 | x           | y           | z           |
|-----|-------------|-------------|-------------|
| H   | 2.19258700  | -1.36779300 | 0.09858400  |
| O   | 1.37613400  | -1.93849200 | -0.34350000 |
| C   | 0.46705600  | -1.01686600 | -0.33673500 |
| C   | 0.92475900  | 0.34709500  | -0.46777900 |
| C   | -1.64034200 | -0.32361300 | 0.08686900  |
| C   | 0.00697600  | 1.37161300  | -0.12916000 |
| O   | 2.70285500  | -0.24035500 | 0.71215900  |
| H   | 2.41707000  | -0.19217800 | 1.63338700  |
| O   | 0.36647800  | 2.66325200  | -0.14622700 |
| H   | 1.31416000  | 2.74823500  | -0.30102100 |
| O   | -2.92008600 | -0.62746700 | 0.28262600  |
| H   | -3.01164400 | -1.58897300 | 0.22228900  |
| H   | 1.78337600  | 0.57085000  | -1.08396800 |
| C   | -1.29355500 | 1.04013800  | 0.16711800  |
| N   | -0.80677100 | -1.33187900 | -0.13204700 |
| H   | -2.04056800 | 1.78731700  | 0.39271500  |

### [HO-THP-OH]• (2-OH)

$G = -549.594130$  au

| 0 2 | x           | y           | z           |
|-----|-------------|-------------|-------------|
| O   | 2.35532400  | -0.50031300 | -0.77146700 |
| H   | 2.90323400  | 0.28545900  | -0.65067300 |
| C   | 1.13445600  | -0.21829600 | -0.30952400 |
| C   | -0.45272000 | 1.37990100  | -0.03241500 |
| C   | 0.16213400  | -1.25260500 | -0.36134200 |
| C   | -1.50496900 | 0.43873800  | 0.04036300  |
| C   | -1.17699000 | -0.88775900 | -0.15502500 |
| H   | -2.51935100 | 0.77651000  | 0.20431300  |
| O   | 1.38153800  | -0.82774500 | 1.51728500  |
| H   | 0.60771700  | -0.51294800 | 2.00709100  |
| H   | 0.45702700  | -2.27627300 | -0.53694100 |

|   |             |             |             |
|---|-------------|-------------|-------------|
| O | -2.08107100 | -1.88530600 | -0.15965400 |
| H | -2.97109100 | -1.53514200 | -0.04503400 |
| O | -0.79597000 | 2.66781100  | 0.10194100  |
| H | 0.01114200  | 3.19581200  | 0.03977700  |
| N | 0.80875500  | 1.09587600  | -0.23081800 |

**[HO-THP-OH]<sup>+</sup> (3-OH)**

G = -549.604303 au

| 0 2 | x           | y           | z           |
|-----|-------------|-------------|-------------|
| O   | -0.44693000 | -2.47822600 | -0.56468400 |
| H   | 0.34021200  | -3.02647400 | -0.44905800 |
| C   | -0.09710300 | -1.20296400 | -0.36570500 |
| C   | 1.49563900  | 0.33747000  | 0.07546300  |
| C   | -1.12342100 | -0.23865000 | -0.40520500 |
| C   | 0.61108500  | 1.41190200  | -0.04168500 |
| C   | -0.70642800 | 1.11090600  | -0.32423400 |
| H   | 0.96949500  | 2.42497600  | 0.08083100  |
| O   | -1.70556300 | -0.44112600 | 1.53434700  |
| H   | -2.11199100 | -1.31489700 | 1.43833000  |
| H   | -2.09358400 | -0.48492000 | -0.81090500 |
| O   | -1.66185600 | 2.03399900  | -0.48865100 |
| H   | -1.30622500 | 2.91938000  | -0.35426600 |
| O   | 2.77454600  | 0.60850000  | 0.35980600  |
| H   | 3.25285500  | -0.22940200 | 0.40816300  |
| N   | 1.16986200  | -0.94083300 | -0.09592200 |

**[HO-THP-OH]<sup>+</sup> (5-OH)**

G = -549.606513 au

| 0 2 | x           | y           | z           |
|-----|-------------|-------------|-------------|
| O   | -1.75322900 | -1.85944200 | -0.53296600 |
| H   | -2.59062400 | -1.40382000 | -0.37374600 |
| C   | -0.75447900 | -0.98087700 | -0.38156200 |
| C   | 1.50989500  | -0.49116500 | 0.09371000  |
| C   | -1.00174800 | 0.40675800  | -0.47151000 |
| C   | 0.10884100  | 1.24909400  | -0.28492700 |
| O   | -2.19903300 | 0.43468600  | 1.28852200  |
| H   | -1.50691000 | 0.22275100  | 1.93302800  |
| H   | -1.90237500 | 0.80081500  | -0.91784000 |
| O   | -0.08471800 | 2.56375400  | -0.41659700 |
| H   | 0.75699800  | 3.00987400  | -0.25505600 |
| O   | 2.74464300  | -0.91306200 | 0.38943800  |
| H   | 3.30688900  | -0.13566200 | 0.50203900  |
| C   | 0.51556800  | -1.44866600 | -0.09651100 |
| N   | 1.32597500  | 0.82721800  | 0.01702400  |

H 0.72443900 -2.50283300 0.01003400

**[HO-THP-OH]<sup>•</sup> (6-OH)**

G = -549.593844 au

| 0 2 | x           | y           | z           |
|-----|-------------|-------------|-------------|
| O   | 2.33898000  | 0.53122800  | -0.77503800 |
| H   | 2.90155900  | -0.24458400 | -0.65669400 |
| C   | 1.12497700  | 0.22668700  | -0.30768200 |
| C   | -1.19901000 | 0.86244400  | -0.15266200 |
| C   | -1.50592200 | -0.46925700 | 0.03533400  |
| C   | -0.44027600 | -1.39299800 | -0.03349300 |
| H   | -2.51967400 | -0.80516300 | 0.19729100  |
| O   | 1.36827900  | 0.84626400  | 1.51552800  |
| H   | 0.61206900  | 0.49703800  | 2.00965800  |
| O   | -0.76018500 | -2.68621600 | 0.10145900  |
| H   | 0.05625700  | -3.19987400 | 0.04212600  |
| O   | -2.20307600 | 1.76055100  | -0.13223100 |
| H   | -1.85979100 | 2.65580400  | -0.22177900 |
| N   | 0.81968700  | -1.08968700 | -0.22824400 |
| C   | 0.13440700  | 1.24641100  | -0.36060900 |
| H   | 0.43474300  | 2.27025000  | -0.53599000 |

**THB-O<sup>•</sup> (1-OH, 3-OH, 5-OH)**

G = -533.524951 au

| 0 2 | x           | y           | z           |
|-----|-------------|-------------|-------------|
| H   | 2.36335400  | -1.18180500 | 0.11556600  |
| O   | 1.62959500  | -1.81086800 | -0.39991500 |
| C   | 0.62113800  | -0.98063400 | -0.36532300 |
| C   | -0.69287400 | -1.39972000 | -0.16355700 |
| C   | 0.93023700  | 0.42328300  | -0.44351000 |
| C   | -1.66209300 | -0.43600800 | 0.08161600  |
| C   | -0.08827600 | 1.36402900  | -0.14347100 |
| C   | -1.37016600 | 0.94680500  | 0.12346500  |
| O   | 2.74143600  | -0.05753000 | 0.79011500  |
| H   | 2.41107500  | -0.06474500 | 1.69684000  |
| H   | -0.91680300 | -2.45771300 | -0.10833200 |
| H   | -2.17425900 | 1.64501700  | 0.32131600  |
| H   | 1.79376000  | 0.75918100  | -0.99812900 |
| O   | 0.27621700  | 2.66085600  | -0.20099900 |
| H   | -0.48281800 | 3.23138500  | -0.03993000 |
| O   | -2.94182500 | -0.75808500 | 0.33426900  |
| H   | -3.06549400 | -1.71283800 | 0.28959500  |

**[HO-THB-OH]<sup>•</sup> (1-OH, 3-OH, 5-OH)**

$G = -533.518189$  au

| 0 2 | x           | y           | z           |
|-----|-------------|-------------|-------------|
| O   | 2.35516000  | -0.64210400 | -0.81980200 |
| C   | 0.68265300  | 1.04634200  | -0.37401900 |
| H   | 3.00146300  | 0.01166700  | -0.52765300 |
| C   | 1.13979900  | -0.30058400 | -0.33208400 |
| C   | -0.66618900 | 1.31521300  | -0.13868400 |
| C   | 0.19771600  | -1.35943900 | -0.24183900 |
| C   | -1.57073600 | 0.28421400  | 0.04077100  |
| C   | -1.12151200 | -1.05446800 | -0.02860500 |
| H   | -2.62194200 | 0.47463100  | 0.22281700  |
| O   | 1.80095800  | 0.05191200  | 1.49032900  |
| H   | 1.04023300  | 0.31995200  | 2.02521600  |
| H   | 0.55846000  | -2.37888000 | -0.29267800 |
| H   | 1.38171700  | 1.85526400  | -0.54141400 |
| O   | -2.08434900 | -1.99701800 | 0.12609000  |
| H   | -1.69411600 | -2.87625900 | 0.09120200  |
| O   | -1.02864400 | 2.62497800  | -0.11275600 |
| H   | -1.98120500 | 2.70380600  | -0.00161400 |

#### **[HO-THB-OH]<sup>-</sup> (2-OH, 4-OH, 6-OH)**

$G = -533.529721$  au

| 0 2 | x           | y           | z           |
|-----|-------------|-------------|-------------|
| O   | 0.50438000  | 2.60680800  | -0.36454300 |
| C   | -1.24612100 | 1.01798000  | 0.05374000  |
| H   | -0.21596100 | 3.22316300  | -0.19739700 |
| C   | 0.06609500  | 1.33348800  | -0.25414100 |
| C   | -1.62111800 | -0.32868600 | 0.09538500  |
| C   | 1.02320600  | 0.32784700  | -0.48385000 |
| C   | -0.70393500 | -1.35412100 | -0.12977100 |
| C   | 0.61115900  | -1.01547800 | -0.41209900 |
| H   | -0.98715000 | -2.39682100 | -0.05504300 |
| O   | 2.34399200  | 0.00289300  | 1.27619400  |
| H   | 1.63056100  | -0.05458400 | 1.92998800  |
| H   | 1.98381400  | 0.59787900  | -0.89836200 |
| H   | -1.99053000 | 1.78349000  | 0.23618400  |
| O   | 1.50715000  | -2.00821200 | -0.58979300 |
| H   | 2.36833300  | -1.67367500 | -0.30234900 |
| O   | -2.91621200 | -0.58097300 | 0.38806500  |
| H   | -3.07926900 | -1.52976500 | 0.39201400  |

#### **Cartesian coordinates of equilibrium geometries (water)**

##### **THP-O<sup>-</sup> (4-OH)**

$G = -473.429804$  au

| -1 1 | x           | y           | z           |
|------|-------------|-------------|-------------|
| C    | -0.62229900 | -1.13007700 | -0.00000400 |
| C    | 0.75165500  | -1.20804400 | 0.00001500  |
| C    | 1.52580600  | 0.00165500  | 0.00013200  |
| C    | 0.74857800  | 1.20983200  | 0.00000400  |
| C    | -0.62495300 | 1.12891100  | -0.00003500 |
| N    | -1.33987100 | -0.00164700 | 0.00000100  |
| H    | 1.24513600  | -2.17154300 | -0.00003600 |
| H    | 1.24049400  | 2.17411100  | -0.00004300 |
| O    | 2.79180600  | 0.00332900  | -0.00005600 |
| O    | -1.34429000 | -2.28596600 | -0.00001500 |
| H    | -2.27645600 | -2.03605600 | 0.00000300  |
| O    | -1.35016600 | 2.28278200  | -0.00000700 |
| H    | -2.28160400 | 2.03019000  | 0.00002300  |

### THP-O<sup>-</sup> (3-OH, 5-OH)

$G = -472.796213$  au

| -1 2 | x           | y           | z           |
|------|-------------|-------------|-------------|
| C    | -0.28832700 | 1.39399100  | -0.00011900 |
| C    | 1.09123100  | 0.90315700  | -0.00001400 |
| C    | 1.41690100  | -0.52022200 | -0.00002200 |
| C    | 0.28031800  | -1.36142100 | -0.00002300 |
| C    | -0.99323700 | -0.78467000 | -0.00000600 |
| N    | -1.31959100 | 0.50099500  | -0.00002400 |
| H    | 1.89184000  | 1.63314800  | 0.00005700  |
| H    | 0.38233100  | -2.43815100 | 0.00000000  |
| O    | 2.61389300  | -0.89642100 | 0.00004500  |
| O    | -0.48592500 | 2.62130900  | 0.00007000  |
| O    | -2.03273600 | -1.64640300 | 0.00003100  |
| H    | -2.84020500 | -1.11485100 | 0.00004100  |

### THP-O<sup>2-</sup> (3-OH, 5-OH)

$G = -472.954209$  au

| -2 1 | x           | y           | z           |
|------|-------------|-------------|-------------|
| C    | -0.22177600 | 1.39790800  | 0.00000100  |
| C    | 1.10598700  | 0.89188500  | -0.00002500 |
| C    | 1.40232300  | -0.49636800 | -0.00015600 |
| C    | 0.25736400  | -1.36652700 | -0.00002700 |
| C    | -0.99445200 | -0.78686300 | -0.00002000 |
| N    | -1.28130500 | 0.50853200  | -0.00003200 |
| H    | 1.92747000  | 1.60164500  | 0.00004500  |
| H    | 0.37625800  | -2.44291100 | 0.00004500  |
| O    | 2.59864300  | -0.96166700 | 0.00011000  |

|   |             |             |            |
|---|-------------|-------------|------------|
| O | -0.48267600 | 2.64864900  | 0.00004200 |
| O | -2.08749800 | -1.62601300 | 0.00003200 |
| H | -2.85902100 | -1.04642200 | 0.00002500 |

**THP-O<sup>•</sup> (4-OH)**

$G = -473.211214$  au

| 0 2 | x           | y           | z           |
|-----|-------------|-------------|-------------|
| C   | -0.66878000 | 1.11217500  | -0.00000400 |
| C   | 0.75406400  | 1.18765100  | 0.00000200  |
| C   | 1.55438900  | 0.00000300  | -0.00001700 |
| C   | 0.75406300  | -1.18764700 | 0.00000200  |
| C   | -0.66877000 | -1.11218400 | -0.00000200 |
| N   | -1.39476700 | 0.00000000  | -0.00000800 |
| H   | 1.21522800  | 2.16724300  | 0.00001800  |
| H   | 1.21526000  | -2.16722300 | 0.00001800  |
| O   | 2.80340300  | -0.00000200 | 0.00000800  |
| O   | -1.30728100 | 2.25999000  | 0.00000400  |
| H   | -2.26380600 | 2.09529400  | 0.00000300  |
| O   | -1.30728500 | -2.25999000 | 0.00000500  |
| H   | -2.26381000 | -2.09528800 | 0.00000300  |

**[HO-THB-OH]<sup>-</sup> (2-C)**

$G = -549.182448$  au

| -1 2 | x           | y           | z           |
|------|-------------|-------------|-------------|
| C    | -0.55673700 | 1.28542700  | -0.00015700 |
| C    | -1.61539100 | 0.34388200  | 0.00018400  |
| C    | -1.32481000 | -1.03544600 | -0.00022800 |
| C    | 0.09083200  | -1.34834400 | -0.00089700 |
| C    | 1.15471400  | -0.29428100 | -0.00007800 |
| N    | 0.72352000  | 1.06989500  | -0.00054100 |
| H    | -2.63675100 | 0.69996500  | 0.00059700  |
| H    | 0.41385500  | -2.38293100 | -0.00038400 |
| O    | -2.18349500 | -1.96463700 | -0.00013700 |
| O    | -0.95123200 | 2.58628100  | -0.00006800 |
| H    | -0.14812900 | 3.12336200  | 0.00003000  |
| O    | 1.95245200  | -0.51778600 | -1.15487400 |
| H    | 2.33620800  | 0.33754600  | -1.38383800 |
| O    | 1.95025900  | -0.51783800 | 1.15622800  |
| H    | 2.33466900  | 0.33719300  | 1.38525200  |

**[HO-THB-OH]<sup>-</sup> (3-C, 5-C)**

$G = -549.182978$  au

| -1 2 | x           | y           | z          |
|------|-------------|-------------|------------|
| C    | -1.53721000 | -0.21958800 | 0.07084600 |

|   |             |             |             |
|---|-------------|-------------|-------------|
| C | -0.75270900 | -1.36871600 | -0.05382600 |
| C | 0.63480900  | -1.26532800 | -0.27090900 |
| C | 1.24588900  | 0.12474400  | -0.14683400 |
| C | 0.21087800  | 1.18126500  | -0.24082500 |
| N | -1.08748900 | 1.02933000  | -0.04623100 |
| H | -1.22280900 | -2.34427200 | -0.03228800 |
| O | 1.41255700  | -2.23204400 | -0.49945300 |
| O | -2.87795100 | -0.36815300 | 0.29425600  |
| H | -3.26152000 | 0.51673300  | 0.31341200  |
| O | 0.69082600  | 2.44080800  | -0.45779700 |
| H | -0.06537500 | 3.04060400  | -0.47739900 |
| H | 2.01519100  | 0.26299900  | -0.91322500 |
| O | 2.01565500  | 0.23038800  | 1.09586600  |
| H | 1.40829800  | 0.03637100  | 1.81942800  |

### **[HO-THB-OH]<sup>-</sup> (4-C)**

$G = -549.150439$  au

| -1 2 | x           | y           | z           |
|------|-------------|-------------|-------------|
| C    | -0.87509800 | 1.14589900  | -0.00445700 |
| C    | 0.46421200  | 1.26408500  | -0.01055900 |
| C    | 1.34621800  | 0.03953200  | -0.08724100 |
| C    | 0.52243800  | -1.19822300 | 0.10595200  |
| C    | -0.87469100 | -1.14115900 | 0.04796900  |
| N    | -1.58147900 | -0.03799100 | -0.00161800 |
| H    | 0.93312300  | 2.24076500  | -0.03719100 |
| O    | 1.93532600  | -0.15940300 | -1.27758200 |
| O    | -1.67723500 | 2.25505100  | -0.01274400 |
| H    | -2.58928500 | 1.94378500  | 0.01667700  |
| O    | -1.54971300 | -2.32054600 | 0.07255300  |
| H    | -2.49303100 | -2.11362500 | 0.08435300  |
| H    | 1.03610200  | -2.15035100 | 0.13449200  |
| O    | 2.38344300  | 0.14039100  | 0.93471800  |
| H    | 1.95040900  | 0.36061300  | 1.76744600  |

### **THB-OH (1-OH, 3-OH, 5-OH)**

$G = -457.806941$  au

| 0 1 | x           | y           | z           |
|-----|-------------|-------------|-------------|
| C   | -1.17803600 | -0.76057000 | 0.00001600  |
| C   | -1.23122300 | 0.62796600  | 0.00000500  |
| C   | -0.06964300 | 1.40026300  | 0.00000700  |
| C   | 1.15955800  | 0.75231200  | 0.00000200  |
| C   | 1.24704000  | -0.63957700 | -0.00001000 |
| C   | 0.07123000  | -1.38015600 | 0.00000300  |
| H   | -2.07864200 | -1.36271900 | 0.00003700  |



|   |             |             |             |
|---|-------------|-------------|-------------|
| H | -0.14115300 | 2.48117800  | -0.00001900 |
| H | 2.21824600  | -1.11917800 | -0.00005700 |
| O | 2.33480600  | 1.43627000  | 0.00000200  |
| H | 2.16779200  | 2.38474500  | 0.00002700  |
| O | -2.41147600 | 1.30333000  | -0.00001400 |
| H | -3.14851400 | 0.68357500  | 0.00000200  |
| O | 0.07739000  | -2.73979700 | -0.00001200 |
| H | 0.98295000  | -3.06744800 | 0.00006300  |

### THB-O<sup>•</sup> (1-OH, 3-OH, 5-OH)

$G = -457.169513$  au

| 0 2 | x           | y           | z           |
|-----|-------------|-------------|-------------|
| C   | 1.30967300  | 0.62601900  | 0.00000500  |
| C   | 1.15633800  | -0.73301100 | 0.00000500  |
| C   | -0.13339500 | -1.31605800 | 0.00000300  |
| C   | -1.28387200 | -0.50600500 | -0.00000300 |
| C   | -1.16907200 | 0.86210900  | -0.00000600 |
| C   | 0.13969700  | 1.48173000  | 0.00000400  |
| H   | 2.28646200  | 1.09531800  | 0.00000900  |
| H   | -0.21508900 | -2.39760100 | 0.00000000  |
| H   | -2.04628100 | 1.49660700  | -0.00001900 |
| O   | -2.52491000 | -1.04914100 | -0.00000500 |
| H   | -2.47804100 | -2.01126300 | 0.00000500  |
| O   | 2.18322900  | -1.61445000 | 0.00000600  |
| H   | 3.02734600  | -1.14903300 | 0.00001700  |
| O   | 0.25535400  | 2.72325000  | -0.00000900 |

### [HO-THP-OH]<sup>•</sup> (1-OH, 3-OH, 5-OH)

$G = -533.557405$  au

| 0 2 | x           | y           | z           |
|-----|-------------|-------------|-------------|
| C   | -0.43895400 | -1.25177400 | -0.01620700 |
| C   | -1.26419900 | 0.00265300  | -0.01412400 |
| C   | -0.44894000 | 1.26004700  | -0.02487100 |
| C   | 0.90368700  | 1.23017500  | -0.01007200 |
| C   | 1.62526400  | 0.00226900  | -0.00454000 |
| C   | 0.92067200  | -1.22317300 | -0.01140600 |
| H   | -0.97304700 | -2.19574000 | -0.01367500 |
| H   | -1.00496700 | 2.19091600  | -0.03178100 |
| H   | 2.70822800  | 0.02897400  | 0.00449400  |
| O   | 1.68982600  | 2.34305300  | 0.00155500  |
| H   | 1.14119400  | 3.13515300  | -0.01239000 |
| O   | -2.11837200 | 0.05580400  | -1.13569400 |
| H   | -2.69591100 | -0.71741300 | -1.10480300 |
| O   | 1.59463600  | -2.40921700 | -0.00949000 |

|   |             |             |             |
|---|-------------|-------------|-------------|
| H | 2.54507500  | -2.25639700 | -0.00114900 |
| O | -2.15104000 | -0.00977900 | 1.11092900  |
| H | -1.62614500 | -0.14557000 | 1.90821700  |

**[HO-THP-OH]<sup>-</sup> (2-OH, 4-OH, 6-OH)**

$G = -533.560359$  au

| 0 2 | x           | y           | z           |
|-----|-------------|-------------|-------------|
| C   | -1.01987800 | 1.20009600  | -0.00619500 |
| C   | 0.33383000  | 1.24975900  | -0.15539300 |
| C   | 1.19819100  | 0.03567400  | -0.26049900 |
| C   | 0.38923400  | -1.22017400 | -0.18343800 |
| C   | -0.96544300 | -1.25077100 | -0.03513100 |
| C   | -1.68578400 | -0.04293000 | 0.04941200  |
| H   | -1.60380400 | 2.11220300  | 0.05438700  |
| H   | 1.76470300  | 0.06540600  | -1.20342600 |
| H   | -1.47402900 | -2.20665900 | 0.02773500  |
| O   | 1.09490200  | -2.37742300 | -0.28417700 |
| H   | 2.02178600  | -2.19057000 | -0.08625300 |
| O   | 1.05030100  | 2.39796700  | -0.26625700 |
| H   | 0.46835000  | 3.16332200  | -0.19658600 |
| O   | -3.03619000 | -0.00980300 | 0.21228600  |
| H   | -3.39189500 | -0.90467500 | 0.23015300  |
| O   | 2.25061900  | 0.00211200  | 0.72826200  |
| H   | 1.83692700  | 0.02821800  | 1.60053500  |

**THB-O<sup>-</sup> (1-OH)**

$G = -457.343138$  au

| -1 1 | x           | y           | z           |
|------|-------------|-------------|-------------|
| C    | 1.31986600  | 0.51428800  | 0.00000800  |
| C    | 1.05148700  | -0.84340700 | 0.00000700  |
| C    | -0.25155100 | -1.34828300 | 0.00000800  |
| C    | -1.29275700 | -0.41764500 | -0.00000200 |
| C    | -1.06814800 | 0.94887100  | -0.00000400 |
| C    | 0.25979900  | 1.48104900  | 0.00001400  |
| H    | 2.34647700  | 0.86966400  | 0.00000600  |
| H    | -0.43137300 | -2.41645800 | 0.00000200  |
| H    | -1.91260100 | 1.62897500  | -0.00002300 |
| O    | -2.60162000 | -0.83552700 | -0.00001000 |
| H    | -2.62995400 | -1.79744600 | 0.00000100  |
| O    | 2.06108100  | -1.77451000 | 0.00000400  |
| H    | 2.90949200  | -1.32002000 | 0.00000900  |
| O    | 0.49126200  | 2.73829300  | -0.00001700 |

**THB-O<sup>-</sup> (3-OH, 5-OH)**

$G = -456.534873$  au

| 0 3 | x           | y           | z           |
|-----|-------------|-------------|-------------|
| C   | 0.54358200  | -1.27730900 | 0.00001100  |
| C   | -0.90033300 | -1.18424500 | 0.00001800  |
| C   | -1.48483700 | 0.14185300  | -0.00000200 |
| C   | -0.65186500 | 1.32870400  | -0.00000800 |
| C   | 0.78553500  | 1.13767500  | -0.00000400 |
| C   | 1.34378800  | -0.13265200 | 0.00000200  |
| H   | 0.99831100  | -2.25995700 | 0.00001300  |
| H   | -2.56207500 | 0.24912400  | -0.00000900 |
| H   | 1.40776600  | 2.02570900  | -0.00001000 |
| O   | -1.15862900 | 2.45992200  | -0.00002300 |
| O   | -1.61819600 | -2.19676000 | 0.00000500  |
| O   | 2.67514000  | -0.33790200 | 0.00000500  |
| H   | 3.15426100  | 0.49888700  | -0.00000100 |

### THB-O<sup>-</sup> (3-OH, 5-OH)

$G = -456.717656$  au

| -1 2 | x           | y           | z           |
|------|-------------|-------------|-------------|
| C    | 0.48667900  | -1.27907600 | -0.00000600 |
| C    | -0.97803800 | -1.11996800 | -0.00008200 |
| C    | -1.48478900 | 0.19604200  | -0.00001800 |
| C    | -0.63825800 | 1.32792400  | 0.00000400  |
| C    | 0.81932400  | 1.09461700  | -0.00001700 |
| C    | 1.34131600  | -0.18157000 | -0.00000200 |
| H    | 0.88914200  | -2.28546700 | 0.00002900  |
| H    | -2.55805800 | 0.34763600  | 0.00000900  |
| H    | 1.46254700  | 1.96886700  | -0.00001100 |
| O    | -1.03577800 | 2.52343400  | 0.00000400  |
| O    | -1.67970700 | -2.16886900 | 0.00005800  |
| O    | 2.68486400  | -0.43610900 | 0.00002200  |
| H    | 3.17392900  | 0.39350800  | 0.00002800  |

### HO-THBO (2-C)

$G = -533.003737$  au

| 0 1 | x           | y           | z           |
|-----|-------------|-------------|-------------|
| C   | -1.09686200 | 1.24653300  | -0.05882800 |
| C   | 0.32872600  | 1.33753500  | -0.02648800 |
| C   | 1.08967800  | 0.06759300  | -0.40388200 |
| C   | 0.38940900  | -1.20390500 | -0.02636700 |
| C   | -0.95200200 | -1.23891300 | 0.05718600  |
| C   | -1.68281500 | 0.00957000  | -0.01652900 |
| H   | -1.70052100 | 2.14044100  | 0.02172300  |
| H   | 1.08061400  | 0.07814800  | -1.50938400 |
| H   | -1.47938300 | -2.16642600 | 0.24202000  |

|   |             |             |            |
|---|-------------|-------------|------------|
| O | 1.15292400  | -2.28420200 | 0.12895300 |
| H | 2.08087500  | -2.00654900 | 0.17460700 |
| O | 0.99554800  | 2.33702900  | 0.21816500 |
| O | -3.01988600 | -0.04032300 | 0.02590300 |
| H | -3.33543600 | -0.95030700 | 0.07516100 |
| O | 2.40747600  | 0.06475000  | 0.06654300 |
| H | 2.60855900  | 0.97618800  | 0.32879900 |

### HO-THBO (4-C)

$G = -533.001477$  au

| 0 1 | x           | y           | z           |
|-----|-------------|-------------|-------------|
| C   | -0.98679300 | -1.32020900 | 0.00246600  |
| C   | -1.79980300 | -0.10221200 | 0.04718000  |
| C   | -1.10778900 | 1.19438800  | 0.02003400  |
| C   | 0.22431700  | 1.26881400  | -0.10442100 |
| C   | 1.08650400  | 0.05407500  | -0.32133700 |
| C   | 0.34506200  | -1.24498200 | -0.11227200 |
| H   | -1.48917200 | -2.27388200 | 0.10458900  |
| H   | -1.71972600 | 2.08464800  | 0.11230800  |
| H   | 1.39946700  | 0.07393800  | -1.37353300 |
| O   | 0.95133100  | 2.39513500  | -0.11763900 |
| H   | 0.38349100  | 3.16740100  | -0.00345300 |
| O   | -3.02192000 | -0.15688100 | 0.13339600  |
| O   | 1.12091300  | -2.33786100 | -0.10488300 |
| H   | 2.04804900  | -2.06870800 | -0.02905600 |
| O   | 2.28964800  | 0.06499800  | 0.41965700  |
| H   | 2.08912600  | 0.19424100  | 1.35499700  |

### HO-THBO (6-C)

$G = -533.002103$  au

| 0 1 | x           | y           | z           |
|-----|-------------|-------------|-------------|
| C   | -1.13210400 | 0.07134700  | -0.36411600 |
| C   | -0.32394500 | 1.33802600  | -0.05927800 |
| C   | 1.10219200  | 1.23080000  | -0.07353700 |
| C   | 1.66815800  | -0.01124700 | 0.00160700  |
| C   | 0.91757200  | -1.24671600 | 0.05980500  |
| C   | -0.42286800 | -1.20918400 | -0.03797600 |
| H   | 1.46450400  | -2.17108500 | 0.19696000  |
| O   | 2.98998400  | -0.20265100 | 0.07047500  |
| H   | 3.46006400  | 0.63999000  | 0.03906900  |
| O   | -0.96279000 | 2.36670800  | 0.13301200  |
| O   | -1.24049300 | -2.26254900 | 0.03097800  |
| H   | -0.74076200 | -3.07569300 | 0.17866500  |
| O   | -2.40515000 | 0.13437100  | 0.21252900  |

|   |             |            |             |
|---|-------------|------------|-------------|
| H | -2.58610300 | 1.07915500 | 0.32975700  |
| H | 1.70237800  | 2.13058400 | -0.01095400 |
| H | -1.20652300 | 0.07185700 | -1.46848300 |

### THB=O

$G = -456.500638$  au

| 0 1 | x           | y           | z           |
|-----|-------------|-------------|-------------|
| C   | 1.52107700  | 0.25927500  | -0.00001300 |
| C   | 0.59861900  | 1.34152400  | 0.00000100  |
| C   | -0.89296200 | 1.06919100  | 0.00000200  |
| C   | -1.36993700 | -0.20688100 | 0.00001200  |
| C   | -0.40727400 | -1.23255200 | 0.00000600  |
| C   | 1.07105400  | -1.06173700 | -0.00002100 |
| H   | 2.57883300  | 0.48528500  | -0.00001700 |
| H   | -1.53824100 | 1.94179600  | 0.00000500  |
| H   | -0.75944000 | -2.26252600 | 0.00001000  |
| O   | -2.65882100 | -0.58671100 | 0.00002400  |
| H   | -3.25032000 | 0.17599100  | 0.00002700  |
| O   | 0.89904400  | 2.53277400  | -0.00001400 |
| O   | 1.74049000  | -2.11524600 | -0.00000300 |

### Cartesian coordinates of transition states (water)

#### THP-O<sup>-</sup> (2-OH, 6-OH)

$G = -549.167105$  au

| -1 2 | x           | y           | z           |
|------|-------------|-------------|-------------|
| H    | -2.24346800 | -1.37140000 | -0.00812100 |
| O    | -1.47728400 | -1.86268900 | -0.45489700 |
| C    | -0.52307700 | -0.93480100 | -0.36522600 |
| C    | -0.93782100 | 0.42909500  | -0.47431100 |
| C    | 1.60729300  | -0.32416600 | 0.10083200  |
| C    | 0.01921600  | 1.48207400  | -0.16641100 |
| O    | -2.67345500 | -0.07686800 | 0.85732600  |
| H    | -2.24849700 | -0.09551400 | 1.72284400  |
| O    | -0.30218000 | 2.68870300  | -0.21649300 |
| O    | 2.86820400  | -0.75242900 | 0.32393200  |
| H    | 2.85716100  | -1.71753800 | 0.28766600  |
| H    | -1.80848900 | 0.68182700  | -1.05999400 |
| C    | 1.34330700  | 1.01884500  | 0.14434700  |
| N    | 0.70500000  | -1.31781600 | -0.11636500 |
| H    | 2.13249300  | 1.72731700  | 0.35783800  |

#### [HO-THB-OH]<sup>-</sup> (2-C, 4-C)

$G = -549.157385$  au

| -1 2 | x           | y           | z           |
|------|-------------|-------------|-------------|
| O    | -2.38868900 | -0.29510700 | -0.73087200 |
| H    | -2.61119000 | -1.23112400 | -0.64857400 |
| C    | -1.11873100 | -0.15064600 | -0.30152900 |
| C    | 0.92134000  | -1.09110000 | -0.03795300 |
| C    | -0.55277100 | 1.15504300  | -0.40013600 |
| C    | 1.58762500  | 0.12130200  | 0.05879600  |
| C    | 0.86789700  | 1.33320500  | -0.16242000 |
| H    | 2.65443800  | 0.14079000  | 0.23577100  |
| O    | -1.50568500 | 0.34558900  | 1.54321700  |
| H    | -0.63922000 | 0.30722900  | 1.96901300  |
| H    | -1.19102400 | 2.00666900  | -0.59143400 |
| O    | 1.38313700  | 2.47864700  | -0.16962100 |
| O    | 1.65711600  | -2.22041100 | 0.08912100  |
| H    | 1.04865400  | -2.96720100 | 0.01947000  |
| N    | -0.38012100 | -1.27613300 | -0.25422200 |

### **THB-O\* (1-OH, 3-OH, 5-OH)**

$G = -533.533694$  au

| 0 2 | x           | y           | z           |
|-----|-------------|-------------|-------------|
| H   | 2.35373000  | -1.19965400 | 0.10541200  |
| O   | 1.63321000  | -1.81612500 | -0.40999400 |
| C   | 0.61513500  | -0.98434900 | -0.36816200 |
| C   | -0.69125900 | -1.40182200 | -0.15934100 |
| C   | 0.92879400  | 0.41727800  | -0.45141800 |
| C   | -1.66218100 | -0.43097300 | 0.08256100  |
| C   | -0.08491100 | 1.36444400  | -0.14804100 |
| C   | -1.36730100 | 0.95119100  | 0.12037400  |
| O   | 2.72589700  | -0.05081500 | 0.81252400  |
| H   | 2.36121100  | -0.07685600 | 1.70593800  |
| H   | -0.92289000 | -2.45751600 | -0.09666400 |
| H   | -2.16774500 | 1.65350400  | 0.31797200  |
| H   | 1.78809000  | 0.74556300  | -1.01699800 |
| O   | 0.28893000  | 2.65672800  | -0.20471500 |
| H   | -0.46426600 | 3.23707700  | -0.04315300 |
| O   | -2.93673600 | -0.75106300 | 0.33645200  |
| H   | -3.06818300 | -1.70652300 | 0.29752100  |

### **[HO-THB-OH]\* (1-C, 3-C, 5-C)**

$G = -533.526487$  au

| 0 2 | x          | y           | z           |
|-----|------------|-------------|-------------|
| O   | 2.36011400 | -0.65222500 | -0.80745300 |
| C   | 0.69560700 | 1.04397600  | -0.37041100 |

|   |             |             |             |
|---|-------------|-------------|-------------|
| H | 2.98059100  | 0.07389700  | -0.67118300 |
| C | 1.14500900  | -0.30590300 | -0.33023300 |
| C | -0.65386100 | 1.31950300  | -0.14176600 |
| C | 0.19870500  | -1.36256700 | -0.24450800 |
| C | -1.56309800 | 0.29255600  | 0.03278700  |
| C | -1.11955400 | -1.04993700 | -0.03585000 |
| H | -2.61318900 | 0.49065800  | 0.21227300  |
| O | 1.75879700  | 0.04211900  | 1.52561600  |
| H | 0.95380400  | 0.22099300  | 2.03239700  |
| H | 0.55015100  | -2.38510800 | -0.29861500 |
| H | 1.40021800  | 1.84945300  | -0.53315900 |
| O | -2.08819300 | -1.98560300 | 0.11216400  |
| H | -1.70847500 | -2.87048500 | 0.07278500  |
| O | -1.00816800 | 2.63031300  | -0.11503200 |
| H | -1.96034600 | 2.71799400  | 0.00303100  |

**[HO-THB-OH]<sup>+</sup> (2-C, 4-C, 6-C)**

$G = -533.628309$  au

| 0 2 | x           | y           | z           |
|-----|-------------|-------------|-------------|
| O   | 0.90011067  | 2.46267377  | -0.49538395 |
| C   | -1.05584093 | 1.14698497  | -0.03583966 |
| H   | 0.27731589  | 3.18183696  | -0.34053248 |
| C   | 0.28822813  | 1.26609835  | -0.34760308 |
| C   | -1.60536830 | -0.13381663 | 0.07889559  |
| C   | 1.10108964  | 0.13218044  | -0.51286564 |
| C   | -0.83613051 | -1.28116410 | -0.09971205 |
| C   | 0.51111349  | -1.13488356 | -0.40716760 |
| H   | -1.26401905 | -2.27111045 | 0.00113445  |
| O   | 2.03830528  | 0.00064248  | 1.59746386  |
| H   | 1.15731352  | -0.02723596 | 2.00376193  |
| H   | 2.12350600  | 0.25051511  | -0.84624118 |
| H   | -1.68590139 | 2.01592485  | 0.10831739  |
| O   | 1.23582271  | -2.26258204 | -0.57445184 |
| H   | 2.16822171  | -2.04333797 | -0.68182887 |
| O   | -2.92211537 | -0.19641233 | 0.38002747  |
| H   | -3.21197208 | -1.11356432 | 0.43989905  |
